# 1 A Genetic Model Therapy Proposes a Critical Role for Liver Dysfunction in 2 Mitochondrial Biology and Disease

3 Ankit Sabharwal<sup>1\*</sup>, Mark D. Wishman<sup>1\*</sup>, Roberto Lopez Cervera<sup>1\*</sup>, MaKayla R. Serres<sup>1</sup>, Jennifer  
4 L. Anderson<sup>2</sup>, Anthony J. Treichel<sup>1</sup>, Noriko Ichino<sup>1</sup>, Weibin Liu<sup>1,3</sup>, Jingchun Yang<sup>1,3</sup>, Yonghe  
5 Ding<sup>1,3</sup>, Yun Deng<sup>1,3,4</sup>, Steven A. Farber<sup>2</sup>, Karl J. Clark<sup>1</sup>, Xiaolei Xu<sup>1,3</sup>, Stephen C. Ekker<sup>1#</sup>

6 <sup>1</sup>Department of Biochemistry and Molecular Biology, Mayo Clinic College of Medicine,  
7 Rochester, MN, United States of America; <sup>2</sup>Carnegie Institution for Science, Department of  
8 Embryology, Baltimore, Maryland, USA; <sup>3</sup>Division of Cardiovascular Diseases, Department of  
9 Medicine, Mayo Clinic College of Medicine, Rochester, MN, United States of America; <sup>4</sup>Present  
10 address: Department of Genetics and Development Biology, College of Life Sciences, Hunan  
11 Normal University, P.R. China

12 \*Equal Contributions

13 #Corresponding Author: Stephen C. Ekker- [Ekker.Stephen@mayo.edu](mailto:Ekker.Stephen@mayo.edu)

## 14 Abstract

15 The clinical and largely unpredictable heterogeneity of phenotypes in patients with  
16 mitochondrial disorders demonstrates the ongoing challenges in the understanding of this semi-  
17 autonomous organelle in biology and disease. Here we present a new animal model that  
18 recapitulates key components of Leigh Syndrome, French Canadian Type (LSFC), a  
19 mitochondrial disorder that includes diagnostic liver dysfunction. LSFC is caused by allelic  
20 variations in the Leucine Rich Pentatricopeptide repeat-containing motif (*LRPPRC*) gene.  
21 *LRPPRC* has native functions related to mitochondrial mRNA polyadenylation and translation as  
22 well as a role in gluconeogenesis. We used the Gene-Breaking Transposon (GBT) cassette to  
23 create a revertible, insertional mutant zebrafish line in the *LRPPRC* gene. *lrpprc* zebrafish  
24 homozygous mutants displayed impaired muscle development, liver function and lowered levels  
25 of mtDNA transcripts and are lethal by 12dpf, all outcomes similar to clinical phenotypes  
26 observed in patients. Investigations using an *in vivo* lipidomics approach demonstrated  
27 accumulation of non-polar lipids in these animals. Transcript profiling of the mutants revealed  
28 dysregulation of clinically important nuclearly encoded and mitochondrial transcripts. Using  
29 engineered liver-specific rescue as a genetic model therapy, we demonstrate survival past the  
30 initial larval lethality, as well as restored normal gut development, mitochondrial morphology

31 and triglyceride levels functionally demonstrating a critical role for the liver in the  
32 pathophysiology of this model of mitochondrial disease. Understanding the molecular  
33 mechanism of the liver-mediated genetic rescue underscores the potential to improve the clinical  
34 diagnostic and therapeutic developments for patients suffering from these devastating disorders.

## 35 **Introduction**

36 The mitochondrion is a complex and essential organelle whose dysfunction is linked to a panoply  
37 of diverse human pathologies and diseases. The understanding of the traditional role of  
38 mitochondria as the powerhouses of the cell has evolved as the many roles in cellular and  
39 physiological homeostasis have been functionally enumerated far beyond this commonly known  
40 role in energy production via the electron transport chain (ETC). Today, mitochondria are known  
41 to directly contribute to calcium signaling, apoptosis, iron homeostasis, lipid metabolism, ATP-  
42 metabolism, immunity, and a host of other critical biochemical synthesis pathways (Green, 1998;  
43 Rizzuto et al., 2009; Spinelli and Haigis, 2018; Tiku et al., 2020; Valero, 2014). All of these  
44 cellular functions rely on well-orchestrated cross-talk between the nuclear and mitochondrial  
45 genome. Genetic lesions arising in the nuclear and/or mitochondrial genome can lead to  
46 mitochondrial dysfunction that present in humans with heterogeneous groups of clinical  
47 manifestations that differentially impact every organ system in the body (Chinnery et al., 2012;  
48 Vafai and Mootha, 2012). The widespread activity of mitochondria provides ample opportunities  
49 for mitochondrial dysfunction to play a role in human disease, but current understanding does  
50 not provide specificity in differential biological function or capacity in accurately predicting  
51 pathogenic details suitable for therapeutic development.

52 Mitochondrial disease can arise directly such as pathogenic genetic variations in mitochondrial  
53 DNA such as Mitochondrial Encephalopathy Lactic acidosis and Stroke (MELAS) or nuclear  
54 DNA including Leigh Syndrome, or as a secondary condition associated with an underlying  
55 pathology such as Alzheimer's disease, diabetes, or cancer (Morales et al., 1992; Newsholme et  
56 al., 2012; Rahman et al., 1996; Urrutia et al., 2014; Wallace, 2012). Even in these circumstances  
57 where the proximal cause of disease initiation is known, the specific manifestations of  
58 mitochondrial dysfunction can produce a wide spectrum of clinical features that vary in severity  
59 and tissue specificity, even within patients harboring identical genetic variations (Gorman et al.,  
60 2016; McFarland et al., 2010). Therefore, establishing causality between phenotypes and genetic  
61 variations for a given mitochondrial disease is often challenging in a clinical setting.

62 Here we focus on Leigh Syndrome, French Canadian Type (LSFC), a well-defined mitochondrial  
63 disease with onset in infancy that manifests with diagnostic liver dysfunction. LSFC is a  
64 monogenic, autosomal recessive condition. LSFC was first discovered in the Saguenay-Lac-

65 Saint-Jean region of Quebec, Canada, where roughly 1 in 23 individuals was found to be a  
66 carrier of a diseased allele (Morin et al., 1993). The most common allelic variant is due to an  
67 A354V transition in exon 9 of the leucine rich pentatricopeptide repeat containing motif  
68 (*LRPPRC*) protein, a nuclear-encoded gene. Other pathogenic variants in *LRPPRC* have been  
69 reported in patients, including an 8 base pair deletion in exon 35 (Mootha et al., 2003) that  
70 presents with reduced phenotypes compared to the A354V mutation. Patients with mutations in  
71 *LRPPRC* experience a diverse array of clinical features centered around cytochrome oxidase  
72 (COX) deficiency. These can include an early onset of hepatic microvesicular steatosis and  
73 chronic lactic acidosis as neonates. Individuals born with LSFC have an average lifespan of less  
74 than 5 years of age with most succumbing to a series of extreme, acute metabolic crises. Patients  
75 that make it past the early life crises show a lessened disease state characterized by hypotonia,  
76 language and mobility deficits and delays, and muscle weakness (Debray et al., 2011; Morin et  
77 al., 1993). *LRPPRC* has also been implicated in other diseases such as neurofibromatosis,  
78 Parkinson's disease, and viral infections such as HIV-1 (Cui et al., 2019).

79 *LRPPRC* belongs to the pentatricopeptide repeat (PPR) containing motif family of proteins.  
80 Pentatricopeptide Repeats (PPRs) are non-catalytic RNA binding domains. PPR proteins consist  
81 of a series of ~35 amino acid repeats wherein two hypervariable residues, those in the 5th and  
82 35th position of the repeat, direct the binding of each repeat region to a single specific  
83 ribonucleotide (Manna, 2015). The *LRPPRC* protein in humans has 20 annotated PPR domains  
84 and is promiscuous, preferentially binding to different mitochondrial RNAs (Figure 1A). The  
85 gene also has tetratricopeptide (TPR)- and HEAT (huntingtin-elongation A subunit-TOR)-like  
86 tandem repeat sequences. The N terminus consists of multiple copies of leucine rich nuclear  
87 transport signals, four copies of the transcriptional co-regulator signature LXXLL and PPR  
88 motifs extending through the C terminus. The C terminus of the protein also consists of ENTH  
89 (Epsin1 N-Terminal Homology) involved in cytoskeletal organization, vesicular trafficking,  
90 DUF (Domain of Unknown Function) 28 and SEC1 domain for vesicular transport. *LRPPRC*  
91 plays roles in the regulation of both nuclear and mitochondrial RNA expression at the  
92 transcriptional and post transcriptional level (Liu and McKeehan, 2002; Mili and Piñol-Roma,  
93 2003).

94 The majority of the protein is imported to mitochondria, where it forms a complex with the  
95 steroid receptor RNA activator stem-loop (*SLIRP*) protein in the mitochondrial matrix. The

96 absence of *LRPPRC* leads to oligoadenylation of the transcripts. Studies using shRNAs to  
97 knockdown *LRPPRC* in MCH58 human fibroblasts showed decreased transcript levels of genes  
98 encoded on the mitochondrial chromosome (Gohil et al., 2010). *LRPPRC-SLIRP* is also  
99 observed to relax RNA structure, making the 5' end of the mRNA accessible for the  
100 mitochondrial ribosome to initiate translation (Cui et al., 2019). Loss of functional *lrpprc* in *C.*  
101 *elegans* and mice revealed defects in mitochondrial biogenesis, decreased complex 1 and  
102 cytochrome c oxidase activity, decreased stability of mitochondrial mRNAs, and dysregulated  
103 mitochondrial translation (Cuillerier et al., 2017; Kohler et al., 2015; Xu et al., 2012).

104 Given that onset of LSFC is marked by the neurological and metabolic crisis (Morin et al., 1993)  
105 and the liver is the major metabolic factory of the cell, therefore, the role of liver impairment in  
106 LSFC represents a unique aspect of mitochondrial disease unseen in traditional Leigh syndrome.  
107 Mice harboring liver-specific inactivation of *Lrpprc* displayed manifestations similar to LSFC  
108 patients marked by mitochondrial hepatopathy, growth delay and reduced fatty acid oxidation  
109 compared to controls. These animals also exhibited impaired cytochrome c oxidase and ATP  
110 synthase activity along with increased susceptibility to calcium-induced permeability transition  
111 (Cuillerier et al., 2017). Recently, a lipidomic profile study on LSFC patients highlighted a novel  
112 role of this protein in the peroxisomal lipid metabolism (Ruiz et al., 2019).

113 Current diagnosis of LSFC hinges on measuring lactate levels in the blood and brain,  
114 cytochrome C oxidase (COX) activity in patient fibroblasts, and sequencing of the *LRPPRC* gene  
115 for mutations (Debray et al., 2011). The lack of a cure or effective therapies for LSFC patients  
116 means that current clinicians must shift their focus to relieving and controlling symptoms. Focus  
117 on dietary restrictions and lifestyle changes, including exercise and infection risk management,  
118 are made to reduce the physiological and metabolic stress on the patient. To build upon a  
119 heuristic paradigm for therapeutic interventions for these classes of disorders, we need to  
120 establish disease models that serve as a suitable substrate to recapitulate the key functional  
121 tissue-specific pathology of the disease.

122 As a model organism, zebrafish (*Danio rerio*) offers various advantages such as a short breeding  
123 cycle, high fecundity, ex utero development, optically clear embryogenesis, rapid development  
124 of internal organs, and easy maintenance (Lieschke and Currie, 2007). Zebrafish are a powerful  
125 potential vertebrate model organism to study human mitochondrial disorders because of the

126 conserved mitochondrial genome and mitochondrial genetic machinery, as compared to its  
127 human counterpart. The zebrafish and human mitochondrial genomes display ~65% sequence  
128 identity at nucleotide level, and share the same codon usage, strand specific nucleotide bias and  
129 gene order (Broughton et al., 2001; Sabharwal et al., 2019a). Recently, the zebrafish model has  
130 shed light on mitochondrial disorders and helped expand our understanding of the mechanisms  
131 of mitochondrial -associated pathology (Byrnes et al., 2018; Flinn et al., 2009; Plucińska et al.,  
132 2012; Song et al., 2009; Steele et al., 2014).

133 We employed an insertional mutagenesis screen using the gene-breaking transposon (GBT)  
134 (Clark et al., 2011) to model LSFC. The GBT construct is incorporated into the intron of an  
135 endogenous gene via Tol2 transposase and uses a splice acceptor site to create a fusion protein  
136 between the native transcript and a monomeric red fluorescent protein (mRFP) gene that contains  
137 a transcription termination site (Fig 1B). When inserted intergenically, this result in translation of  
138 a truncated endogenous gene product fused to mRFP. This enables spatiotemporal tracking of the  
139 trapped gene's natural protein expression in real time. This insertion is reversible due to two loxP  
140 sites located near each terminal repeat that enables removal of the GBT cassette using Cre  
141 recombinase. The revertible nature of this construct allows for reversion of the mutant back to  
142 wild type alleles to allow for tissue-specific or ubiquitous rescue of the mutated gene (Clark et  
143 al., 2011; Ichino et al., 2019).

144 We describe here the first revertible zebrafish mutant with a single disruptive insertion in the  
145 *lrpprc* gene to model LSFC. *lrpprc* homozygous mutants mimic many hallmarks observed in  
146 patients such as early lethality, defective muscle development and decreases in mitochondrial  
147 transcript levels. In addition, altered dietary lipid metabolism along with mitochondrial  
148 dysmorphology was also observed in these mutants. A key outcome of this study is the reversion  
149 of the LSFC-associated phenotype and survival using liver-specific Cre recombinase in the  
150 homozygous *lrpprc* mutants, demonstrating a critical role of this organ in the pathogenesis of  
151 disease in this animal model. This result contributes a novel paradigm towards identification of  
152 therapeutic approaches for LSFC and for other related disorders.

## 153 **Methods**

### 154 **Zebrafish handling and husbandry**

155 All adult zebrafish and embryos were maintained according to the guidelines established by  
156 Mayo Clinic Institutional Animal Care and Use Committee (Mayo IACUC) (IACUC number:  
157 A34513-13-R16).

### 158 **Mutant generation**

159 The GBT0235 allele was generated by injecting the pGBT-RP2.1 cassette as described to create  
160 the *in vivo* protein trap lines (Clark et al., 2011; Ichino et al., 2019). Generation of these  
161 transgenic fish lines involved microinjection of the vector DNA together with the transposase  
162 RNA (Tol2) in single cell zebrafish embryos, followed by screening of the injected animals for  
163 GFP and RFP expressions. To generate the larvae for liver-specific rescue data, non-GBT  
164 transgenic marker lines carrying liver-specific Cre recombinase *Tg(-2.8fabp10:Cre;*  
165 *-0.8cryaa:Venus)<sup>S955</sup>* were used. *Tg(MLS: EGFP)* transgenic line was used to generate larvae to  
166 study the subcellular localization of the truncated fusion protein.

### 167 **Zebrafish embryo genotyping (ZEG) protocol**

168 Deficiency of LRPPRC in humans shows an early neonatal phenotype, necessitating the ability  
169 to investigate GBT0235 mutants at early stages of life. Likewise, our *lrpprc<sup>GBT0235/GBT0235</sup>*  
170 mutants exhibit lethality starting around 8 dpf. We needed the ability to genotype larvae at a  
171 young age without sacrificing to enable experiments to be efficiently conducted on living  
172 animals such as the survival assays and HPLC lipid analysis. An automated genotyping device  
173 was employed for the rapid cellular extraction of DNA from zebrafish embryos (Lambert et al.,  
174 2018). Larvae at 3 days post fertilization (dpf) were rinsed three times in fresh embryo water and  
175 transferred to a new petri dish. Larvae were aspirated in 12  $\mu$ L of embryo media and placed on  
176 extraction chips in individual wells. An evaporation cover was attached, and the larvae were  
177 agitated using a vibrating motor that was powered with 2.4V for 10 minutes. Immediately  
178 following the vibration period, the samples were removed from the chip and placed into strip  
179 tubes for storage. Larvae were replenished with embryo water and individually transferred to a  
180 24 well plate for storage at 28°C. The collected sample was used as a template for PCR  
181 amplification for genotyping of the larvae. Two PCR reactions were run using the same thermal

182 cyclor conditions. The first consisted of 5  $\mu$ L of 5x MyTaq Red PCR Buffer, 1  $\mu$ L of 10 $\mu$ M  
183 GBT0235ex22 FP2, 1  $\mu$ L of 10 $\mu$ M GBT0235 WT RP, 0.25  $\mu$ L of MyTaq DNA Polymerase, 3.5  
184  $\mu$ L of template, and 14.75  $\mu$ L dH<sub>2</sub>O. The second PCR setup replaced the 10 $\mu$ M GBT0235 WT  
185 RP with RLC\_mRFP R1. Samples were run in a thermal cyclor with following PCR conditions:  
186 (1) 95°C, 5 min; (2) 95°C, 1 min; (3) 61.3°C, 30 sec; (4) 72°C, 1 min; (5) Go to step 2 39X; (6)  
187 72°C, 5 min; (7) 12°C, hold. Samples were run on a 1% agarose gel and analyzed. We tested our  
188 locus-specific *lrpprc* primers (Supplementary Table 1) and found successful amplification of  
189 both our *lrpprc*<sup>+/+</sup> and *lrpprc*<sup>GBT0235/GBT0235</sup> bands.

### 190 **Genotyping of zebrafish larvae by fin clipping**

191 This larval genotyping protocol was adapted from previously described study (Wilkinson et al.,  
192 2017). Larvae were placed in a petri dish containing 3  $\mu$ L of 20% Tween per 30 mL of embryo  
193 media. Larvae were individually placed on an inverted petri dish under a dissecting scope using  
194 trans-illumination. A scalpel was used to cut the tail distal to the blood flow. The fin clip was  
195 removed from the solution using forceps and placed into a PCR strip tube containing 10  $\mu$ L of 50  
196 mM NaOH. Scalpel and forceps were sterilized with an ethanol wipe between biopsies. Larvae  
197 were transferred into a petri dish with fresh embryo media before being moved to a 24-well plate  
198 for recovery while genotyping was performed. Tail biopsies were capped and heated to 98°C for  
199 10 minutes and then cooled to 25°C. 10 $\mu$ L of 100mM Tris pH8 was added to each tube and  
200 mixed. These samples were then used for PCR amplification. Following genotyping, embryos  
201 were grouped by genotype and placed in petri dishes until needed for experiments.

### 202 **Capturing the spatio-temporal expression dynamics in the *in vivo* protein trap lines**

203 Larvae were treated with 0.2 mM phenylthiocarbamide (PTU) at 24 hours post fertilization (hpf)  
204 to prevent pigmentation. Fish were anesthetized with 1X tricaine and mounted in 1.5% agarose  
205 (Fisher Scientific, USA) prepared with 1X tricaine solution (0.18 mg/L) in an agarose column in  
206 the imaging chamber. For Lightsheet microscopy, larval zebrafish were anesthetized with 1X  
207 tricaine in embryo water during imaging procedure. RFP expression patterns of 6 dpf larval  
208 zebrafish were captured using LP 560 nm filter as excitation and LP 585nm as emission using a  
209 Lightsheet Z.1 microscope (Zeiss, Germany) 5X/0.16 NA dry objective. Confocal microscopy  
210 was carried out embedding the 6 dpf larvae in 1 % (w/v in E2 medium containing tricaine) low-  
211 melting agarose (Fisher Scientific, USA) in a 50-mm glass bottom dish (MatTek, USA). Once



212 the agarose set, it was immersed in E2 medium containing tricaine to prevent drying. Each set of  
213 brightfield and RFP images for both heterozygous and homozygous mutants were acquired using  
214 Zeiss LSM780 (40XW/1.2 NA) and the images shown are the maximum image projections of  
215 the z-stacks obtained from each direction.

## 216 Colocalization analysis

217 *lrpprc*<sup>GBT0235/+</sup> adult zebrafish were out-crossed to *Tg(MLS:EGFP)* zebrafish (Kim et al., 2008;  
218 Sabharwal et al., 2019b) to obtain *Tg(MLS:EGFP) lrpprc*<sup>GBT0235/+</sup>. Embryos were maintained in  
219 0.2 mM phenylthiocarbamide from 24 hpf and anesthetized with tricaine (0.18 mg/L). Larvae  
220 sample preparation was done as described above. The 2 dpf larvae were viewed under a Zeiss  
221 LSM780 confocal microscope. Laterally oriented Z-stacks of representative images of the caudal  
222 fin for GFP and mRFP expressions were captured using the laser with Ex488 and Ex561,  
223 respectively under a 63XW/1.2 NA water objective. Each set of images were independently  
224 acquired at different fluorescent wavelengths and a composite image was generated using Zeiss  
225 Zen microscope software.

## 226 Survival assay

227 *lrpprc*<sup>GBT0235/+</sup> adult zebrafish were crossed with *Tg(-2.8fabp10:Cre; -0.8cryaa:Venus)<sup>S955</sup>* to  
228 obtain double transgenic adult zebrafish expressing both the GBT cassette and the fabp10 driven  
229 Cre recombinase (liver rescued). At 5 dpf the larval zebrafish were anesthetized using 1X  
230 tricaine (0.18 mg/L) and screened for RFP fluorescence and gamma crystalline Venus (V) and  
231 sorted. The resultant groups were {RFP-,V- (*lrpprc*<sup>+/+</sup>)}, {RFP-,V+ (*lrpprc*<sup>+/+</sup>, liver (fabp10-cre)  
232 rescued)}, {RFP+,V+ (*lrpprc*<sup>GBT0235/+</sup> and *lrpprc*<sup>GBT0235/GBT0235</sup>, liver (fabp10-cre) rescued)},  
233 {RFP+,V-, BL+ (*lrpprc*<sup>GBT0235/GBT0235</sup>)}, {RFP+,V-, BL- (*lrpprc*<sup>GBT0235/+</sup>)}. At 5 dpf, the RFP+/V-  
234 group was anesthetized and sorted based on the presence of darkened liver (DL) phenotype on a  
235 brightfield microscope. The resultant groups were R+/V-/DL+ and R+/V-/DL-. It is assumed at  
236 this point that the R+/V- BL+ larvae are the GBT0235 (*lrpprc*) homozygous offspring and the  
237 R+/V- BL- larvae are the GBT0235 heterozygous offspring, based on phenotypic  
238 characterization of homozygous GBT0235 larval zebrafish. The above-mentioned groups were  
239 placed on the Mayo Clinic Zebrafish Facility at 6 dpf. Live counts were recorded daily from 6  
240 dpf to 12 dpf. At the end point (12 dpf) the remaining larvae from each group were counted and

241 euthanized for genotyping using NaOH extraction followed by PCR using primers listed in  
242 Supplementary Table 1.

### 243 **RNA extraction and sample preparation**

244 *lrpprc*<sup>GBT0235/+</sup> adult zebrafish were incrossed and embryos collected and placed in a 28°C  
245 incubator until larvae were ready for RNA isolation. Larvae were sorted for RFP expression on 6  
246 dpf and separated into dishes. RNA isolation was performed using trizol extraction. Briefly,  
247 larvae were placed in 500 µL of trizol and homogenized using a handheld homogenizer on ice  
248 and then incubated at room temperature for 5 minutes. Chloroform was added followed by a 15-  
249 minute incubation on ice before spinning in tabletop centrifuge at 4°C for 15 minutes. The  
250 aqueous layer was removed and placed into a separate 1.7mL centrifuge tube, some of which  
251 was used to genotype the larvae. The remainder was put through a series of ethanol and DNase I  
252 treatments to isolate and purify the RNA. Each embryo was genotyped using the *lrpprc* ex22\_F,  
253 GBT0235\_R1, and mRFP R1 and RNA samples were grouped according to genotype. RNA  
254 quantity and quality were assured to meet the standards of the Genewiz RNA-sequencing  
255 platform using the spectrophotometer.

### 256 **Mitochondrial DNA relative gene expression analysis**

257 Adult *lrpprc*<sup>GBT0235/+</sup> zebrafish were mated and embryos were collected. Larvae were analyzed  
258 for RFP expression and darkened liver (DL) phenotype at 6 dpf. RFP positive, DL positive fish  
259 were used as the experimental group to measure mtDNA transcript expression against RFP  
260 negative, DL negative embryos as a control. For each clutch, 3 fish from each condition were  
261 sorted for RNA extraction. After initial sorting, individual larvae were placed in a 1.7mL tube  
262 with 350 µL of RLT buffer: BME at 100:1. Embryos were then homogenized using ~30 steel  
263 beads and tissue lysed at max frequency for 5 minutes. Homogenized samples were then added to  
264 Maxtract tubes, carefully avoiding the steel beads and a phenol/chloroform preparation was used  
265 to separate out nucleic acid material. RNA was then isolated and purified using the RNeasy  
266 Micro Kit (Qiagen, USA) according to manufacturer's specifications and spectrophotometry was  
267 performed for sample quantification. 250 ng of RNA per fish was used for reverse-transcription  
268 into cDNA using the Thermo Fisher SuperScript II kit (Thermo Fisher Scientific, USA).  
269 Requisite no reverse transcriptase (RT) controls were run parallel to test for genomic DNA  
270 contamination. cDNA was diluted 16-fold with deionized water and amplified using the

271 SensiFAST SYBR Lo-ROX kit (Bioline, USA) for qRT-PCR analysis. Each sample was run in  
272 triplicate for RT conditions and duplicate for NRT conditions. Process was repeated for four  
273 individual clutches of GBT0235 embryos. Wild type and mutant transcripts levels were  
274 normalized to eukaryotic translation elongation factor 1 alpha 1, like 1(*eef1a1l1*).

## 275 **Birefringence assay**

276 *lrpprc*<sup>GBT0235/+</sup> adult zebrafish were in-crossed to obtain a population of *lrpprc*<sup>+/+</sup>, *lrpprc*<sup>GBT0235/+</sup>,  
277 and *lrpprc*<sup>GBT0235/GBT0235</sup> offspring. Embryos & larvae were maintained in E2 embryo medium at  
278 28.5°C at a density of 30 per dish and kept on a 14-hour light/10-hour dark cycle. At ~96 hours  
279 post-fertilization, 12 larvae per parental pair were anesthetized with tricaine (0.18 mg/L) and  
280 embedded as described in the previous section. The larvae were viewed using a Stemi SV11  
281 stereomicroscope (Zeiss, Germany) equipped with a polarized lens underneath the stage and  
282 polarized lens on the objective lens. The polarized lens on the objective was rotated until the  
283 background went dark. Birefringence images were then acquired using a DSLR camera (Canon,  
284 Powershot G10) in RAW mode using an ISO of 200, aperture of f/4.5, and an exposure of 1/15 s.  
285 Larvae were subsequently rescued from agarose using ultra-fine forceps, placed into 8-strip  
286 tubes, euthanized by tricaine overdose, and lysed for DNA extraction using 30 µL of 50 mM  
287 NaOH (incubated at 95°C for 25 minutes, then neutralized with 3 µL of 1 M Tris-HCl (pH = 8)).  
288 This neutralized lysate was used for PCR genotyping.

289 RAW images were converted to 8-bit grayscale TIFFs in Adobe Photoshop. Grayscale TIFF  
290 birefringence images were imported into NIH ImageJ/FIJI for further analysis. We outlined an  
291 area in each individual fish that corresponded to the birefringence from its body using the wand  
292 tool (legacy mode, threshold = 16). The birefringence signal from the otolith was specifically  
293 excluded from these measurements. All outlined regions were saved as regions of interest  
294 (ROIs). Within these ROIs, measurements for area, mean gray value, min gray value, max gray  
295 value, and integrated gray value density were obtained. During data collection and analysis,  
296 experimenters were blind to the genotype and RFP expression pattern of the larvae. After un-  
297 masking the data, area, mean gray value, and integrated gray value density were utilized to make  
298 plots and assessed for statistical differences between *lrpprc*<sup>+/+</sup> and *lrpprc*<sup>GBT0235/GBT0235</sup> animals.  
299 Each individual data point represents a single animal. Each parental pair represents a biological  
300 replicate. This dataset contains five biological replicates from two separate days.

## 301 **RNA sequencing and analyses**

302 RNA library preparations and sequencing reactions were performed at GENEWIZ, LLC. (South  
303 Plainfield, NJ, USA). Quantification of RNA samples was carried out using Qubit 2.0  
304 Fluorometer (Thermo Fisher Scientific, USA) and further, the RNA integrity was checked using  
305 Agilent TapeStation 4200 (Agilent Technologies, USA). RNA sequencing libraries were  
306 prepared using the NEB Next Ultra RNA Library Prep Kit for Illumina using manufacturer's  
307 instructions (NEB, USA). Briefly, mRNAs were initially enriched with oligo(dT)  
308 beads. Enriched mRNAs were fragmented for 15 minutes at 94°C. Subsequently, cDNA  
309 fragments were synthesised, end repaired and adenylated at 3'ends, and universal adapters were  
310 ligated to them, followed by index addition and library enrichment by PCR with limited cycles.  
311 The sequencing library was validated on the Agilent TapeStation (Agilent Technologies, USA),  
312 and quantified by using Qubit 2.0 Fluorometer (Thermo Fisher Scientific, USA) as well as by  
313 quantitative PCR (KAPA Biosystems, USA). The sequencing libraries were clustered on a single  
314 lane of a flow cell. After clustering, the flowcell was loaded on the Illumina HiSeq4000  
315 instrument according to manufacturer's instructions. The samples were sequenced using a  
316 2x150bp Paired End (PE) configuration. Image analysis and base calling were conducted by the  
317 HiSeq Control Software (HCS). Raw sequence data (.bcl files) generated from Illumina HiSeq  
318 was converted into fastq files and de-multiplexed using Illumina's bcl2fastq 2.17 software. One  
319 mismatch was allowed for index sequence identification.

320 Paired-end reads of 150 bp length generated for the homozygous mutant and the wild type was  
321 trimmed with a base quality cut off of Phred score Q30 using Trimmomatic (Bolger et al., 2014).  
322 Filtered reads were pseudoaligned to the zebrafish reference genome Zv10 version. Kallisto  
323 (Bray et al., 2016) was used for transcript assembly and calculation of relative expression values  
324 across transcripts. Tximport (Soneson et al., 2015) was used to summarize transcript level counts  
325 at gene level. Differential expression was computed using DESeq2 as counts per million (CPM)  
326 (Love et al., 2014). Genes with a fold change of greater than  $\log_2 0.5$  and less than  $\log_2 0.5$  were  
327 considered to be upregulated and downregulated respectively.

328 Human orthologs of differentially expressed zebrafish genes were identified from ZFIN  
329 (Zebrafish Information Network) and Ensembl. Differentially expressed human orthologs of  
330 zebrafish genes were run against the human Mitocarta database to identify upregulated and  
331 downregulated mitochondrial genes involved in biological pathways resident in mitochondria

332 (Calvo et al., 2016). Differentially expressed genes were entered in the PANTHER (Mi et al.,  
333 2019) database to identify the protein class and biological process of these genes. For the  
334 differentially expressed genes, we predicted the enriched or depleted pathways by using a web  
335 based integrated analysis platform, Genetrait2 (Stockel et al., 2016). Differentially expressed  
336 genes along with their respective calculated scores were fed as the input file. Scores were  
337 calculated as per the following formula:  $\text{Score} = \{-\log_{10}(\text{p-value}) * \log_2 \text{fold change}\}$ .  
338 Kolmogorov-Smirnov test was used as the statistical test for the gene set enrichment analysis to  
339 find enriched/depleted biological pathways from the KEGG pathways, Reactome pathways and  
340 Wiki pathways.

### 341 **Oil Red O staining**

342 For whole mount staining at the larval stage, 8 dpf larvae were fixed in 10% NBF overnight. The  
343 Oil Red O staining procedures were followed as described previously (Kim et al., 2013). Briefly,  
344 *lrpprc*<sup>+/+</sup>, *lrpprc*<sup>GBT0235/GBT0235</sup> and *Tg(fabp10:Cre)lrpprc*<sup>GBT0235/GBT0235</sup> larvae were rinsed three  
345 times (5 minutes each) with 1× PBS/0.5% Tween-20 (PBS-T). After removing PBS-T, larvae  
346 were stained with a mixture of 300 μL of 0.5% ORO in 100% isopropyl alcohol and 200 μL of  
347 distilled water for 15 minutes. Larvae were then rinsed with 1× PBS-Tween for three times,  
348 twice in 60% isopropyl alcohol for 5 minutes each, briefly rinsed in PBS-Tween, fixed in 10%  
349 NBF for 10 minutes, and then mounted in glycerol for imaging. All outlined regions were saved  
350 as regions of interest (ROIs). Within these ROIs, measurements for area were obtained and plots  
351 and statistical analyses were performed. Oil Red O images were captured with a color camera in  
352 JPEG format. For analysis, all images were de-identified using the sample function in R  
353 (<https://www.r-project.org>, <https://rstudio.com>). De-identified JPEG images were then imported  
354 into NIH FIJI/ImageJ and converted from RGB color images to 8-bit grayscale images. For each  
355 batch of images (corresponding to one day of experiments), an image with dark Oil Red O  
356 staining and an image with light Oil Red O staining were respectively used to determine the  
357 lower and upper gray values (the threshold) for positive staining. Briefly, the lower edge of the  
358 threshold was set as the gray value that most pixels representing melanocytes were darker than,  
359 but almost all dark Oil Red O staining was brighter than. Similarly, the upper edge of the  
360 threshold was determined to be the gray value where most pixels representing the background  
361 outside of the fish were brighter than, but some light Oil Red O staining was darker than. This  
362 left a range of 40-45 gray values that encompassed the most Oil Red O staining. To quantify only

363 the Oil Red O staining in the liver, we drew a single region of interest that bordered the liver of  
364 the most darkly stained larvae. This region of interest (ROI) specifically excluded the area  
365 around the swim bladder due to accumulation of Oil Red O solution surrounding the swim  
366 bladder in a majority of images. Within this ROI, the area of pixel values within the threshold in  
367 each larva was determined using the “limit to threshold” option in the “set measurements” menu  
368 in FIJI. After areas of Oil Red O staining were extracted from the images, they were re-identified  
369 into three groups: *lrpprc*<sup>+/+</sup>, *lrpprc*<sup>GBT0235/GBT0235</sup>, and *Tg(fabp10:Cre)/lrpprc*<sup>GBT0235/GBT0235</sup>.

### 370 **Electron microscopy of hepatocyte mitochondria and image analysis**

371 Wild-type, *lrpprc*<sup>GBT0235/GBT0235</sup>, and *Tg(fabp10:Cre)/lrpprc*<sup>GBT0235/GBT0235</sup> zebrafish larvae were  
372 fixed and imaged using transmission electron microscopy as described in the previous study  
373 (Wilson et al., 2019). Briefly, 4 dpf embryos were fixed for 1 to 3 hours in a mixture of 3%  
374 glutaraldehyde, 1% formaldehyde, and 0.1 M cacodylate. Embryos were embedded in 2% low  
375 melt agarose followed by processing as described earlier (Zeituni et al., 2016). Following  
376 embedding steps, post-fixation for 1 hour with 1% osmium tetroxide and 1.25% potassium  
377 ferricyanide in cacodylate solution occurred. Larvae were rinsed twice with water and incubated  
378 in 0.05 maleate pH 6.5 before staining overnight at 4°C in 0.5% uranyl acetate. Following  
379 overnight incubation, samples were washed with water and dehydrated using ethanol dilution.  
380 Samples were washed with propylene oxide and then incubated with propylene oxide/resin  
381 followed by an overnight evaporation period. Finally, larvae were embedded in 100% resin at  
382 55°C overnight and then 70°C for three days. Sectioning was performed on Reichert Ultracut-S  
383 (Leica Microsystems, Germany), mounted on mesh grids, and stained with lead citrate. Images  
384 were taken using a Phillips Technai-12 electron microscope and 794 Gatan multiscan CCD  
385 camera. Images were scored for hepatocytes using classical hallmark of lipid droplets and  
386 subsequently were de-identified and scored by genotype for mitochondrial morphology, in  
387 particular the structure and integrity of mitochondrial cristae.

### 388 **Feeding of fluorescently tagged long-chain fatty acids**

389 Larvae were genotyped for number of copies (0, 1, or 2) of the RP2 insertion into the *lrpprc*  
390 locus and presence or absence of the liver-specific CRE construct (*-2.8fabp10:Cre*; *-*  
391 *0.8cryaa:Venus*). In each of four experiments, an equal number of 6 dpf larvae of each genotype  
392 (18–24) was pooled and arrayed separately in Falcon brand 6-well tissue culture plates for

393 delivery of a fluorescently tagged long-chain fatty acid feed. 4,4-difluoro-5,7-dimethyl-4-bora-  
394 3a,4a-diaza-*s*-indacene 3-dodecanoic acid (BODIPY™ FL C12; Thermo Fisher Scientific, USA)  
395 (4 µg/mL) was emulsified in a solution of 5% chicken egg yolk liposomes (in embryo medium)  
396 as previously described (Carten et al., 2011). Since larvae can vary greatly in amount they ingest,  
397 non-metabolizable TopFluor Cholesterol (conc, 23-(dipyrrometheneboron difluoride)-24-  
398 norcholesterol; Avanti Lipids, USA) was added to the feed solution to serve as a readout of  
399 amount ingested, allowing for normalization of the HPLC output. TopFluor Cholesterol is harder  
400 to get into solution compared to BODIPY FL C12: embryo medium and 1% fatty acid-free BSA  
401 was prewarmed to 30°C. After 4 hours of feeding in a light-shielded shaking incubator (30°C, 30  
402 rpm), larvae were rinsed in fresh embryo media and screened for ingestion (darkened intestines)  
403 under a stereomicroscope. Larvae that did not eat were disincluded from the study. Larvae that  
404 ate were moved to tissue culture plates with fresh embryo media for an overnight chase period of  
405 12.5 h in a 28.5°C light-cycling (14 h on, 10 h off) incubator. Pools of 8–13 larvae from each  
406 group were snap frozen on dry ice in microcentrifuge tubes and stored dry at -80°C for lipid  
407 extraction.

#### 408 **Sample preparation and HPLC analyses of long-chain fatty acids**

409 Frozen samples of pooled larvae were subject to lipid extraction using a modified Bligh-Dyer  
410 procedure. Extractions were dried and resuspended in 50 µL HPLC-grade isopropanol (HPLC  
411 injection solvent). Sample components were separated and detected by an HPLC system as  
412 described previously (Quinlivan et al., 2017). Chromatographic peak baselines were manually  
413 delimited and peak areas were automatically measured (Chromeleon 7.2; Thermo Fisher  
414 Scientific). Peak areas per larval equivalent were calculated and normalized to the TopFluor  
415 Cholesterol peak (non-metabolizable; added to the fluorescent fatty acid feed). To fit a linear  
416 model wherein the outcomes may have possible unknown correlations, generalized estimated  
417 equations (gee) was performed on the R platform comparing total triglyceride area as well as  
418 individual peaks/groups of peaks. Assessment of normality by visual examination of Q-Q  
419 (quantile-quantile) plots confirmed that the standard normal curve is a valid approximation for  
420 the distribution of the data. P-values were obtained from the standard normal Z-table.

## 421 **Statistical analyses**

422 Plots and statistical analyses including Man-Whitney U test, Sidak's multiple comparisons test,  
423 student's t-test and construction of heat map were performed in GraphPad Prism 8 (GraphPad  
424 software). Pearson's correlation coefficient and Manders split coefficients were used for pixel  
425 intensity spatial correlation analysis using coloc2 plugin of Fiji image processing package.  
426 Statistical significance was derived by Costes p test. Kolmogorov-Smirnov test was used as the  
427 statistical test for the gene set enrichment analysis on GeneTrail2 webserver. Results of the  
428 statistical analyses have been described either in the results section or in the figure legends.

## 429 **Results**

### 430 **Spatiotemporal expression dynamics of GBT0235 tagged by the *in vivo* protein trapping**

431 To generate and identify the *in vivo* protein trap mutant, a GBT mutagenesis screen was  
432 conducted as described previously (Ichino et al., 2019). Briefly, genomic DNA and mRNA  
433 expression analyses revealed that the *in vivo* protein trap line GBT0235 contained a single RP2.1  
434 integration event within intron 22 (38 exons total) of the *lrpprc* gene on chromosome 13 (Figure  
435 1B). The RP2.1 GBT protein trap cassette overrode the transcriptional splicing machinery of the  
436 endogenous *lrpprc* gene, creating an in-frame fusion between the upstream endogenous exons  
437 and the start codon-deficient mRFP reporter sequence. This mRFP-fusion resulted in a  
438 translation product that was predicted to be truncated from 1461 amino acids to 793 amino  
439 acids. RFP expression analysis of GBT0235 during zebrafish embryonic development revealed  
440 onset of reporter expression as early as one cell stage that could be traced until late larval stages.  
441 For instance, animals heterozygous for the GBT0235 allele (hereafter *lrpprc*<sup>GBT0235/+</sup>) exhibit  
442 ubiquitous RFP expression throughout the body at 6 dpf with strong expression in liver, gut and  
443 muscles (Figure 2A). To estimate transcriptional effects of the GBT vector in GBT0235, qPCR  
444 was carried out on the cDNA from homozygous mutants using primers spanning exon 22-23 of  
445 the genomic locus—the site of insertion. Endogenous *lrpprc* transcript levels were negligible in  
446 homozygous mutants, *lrpprc*<sup>GBT0235/GBT0235</sup>, as compared to wild type controls, *lrpprc*<sup>+/+</sup>,  
447 indicating a nearly complete knockdown of the endogenous gene (Figure 2B).



448 ***lrpprc*<sup>GBT0235/+</sup> mutants exhibit mitochondrial localization of Lrpprc-mRFP protein**

449 In humans *LRPPRC* is a nuclear-encoded gene that encodes for a protein that can be translocated  
450 to the mitochondria (Siira et al., 2017; Sterky et al., 2010) where it is known to play an important  
451 role in mitochondrial mRNA stability. To investigate the subcellular localization of the mRFP  
452 fusion protein (the truncated *Lrpprc* tagged to mRFP), we crossed *lrpprc*<sup>GBT0235/+</sup> to  
453 *Tg(MLS:EGFP)* zebrafish. The *Tg(MLS:EGFP)* line served as a positive control wherein EGFP  
454 is fused to the mitochondrial localization signal derived from the zebrafish ortholog of human  
455 *COX8A* (Kim et al., 2008). Larvae from the outcross of *lrpprc*<sup>GBT0235/+</sup> and *Tg(MLS:EGFP)* were  
456 imaged at high magnification (63X) using confocal microscopy. The caudal fin of 2 dpf (Figure  
457 2C) and myocytes (skeletal muscle region) of 4 dpf (Supplementary Figure 1) zebrafish embryos  
458 were selected to observe the mitochondrial network. The caudal fin presents a unique advantage  
459 of studying the mitochondrial sub-cellular network *in vivo* as it is as few as two cells thick.  
460 Images were taken showing the reticular mitochondrial network marked by the GFP  
461 (*Tg(MLS:EGFP)*) and the expression pattern of the *Lrpprc*-mRFP in skin cells. Resulting images  
462 were overlaid to generate a composite image and revealed an overlap between the GFP and  
463 *Lrpprc*-mRFP fusion protein in caudal fin in the zebrafish larvae (Figure 2C). (For caudal fin  
464 image: Pearson's correlation coefficient- 0.66; Manders' split coefficient R1- 0.91; Manders'  
465 split coefficient R2- 1.0; Costes p-value – 1.0)

466 ***lrpprc*<sup>GBT0235/GBT0235</sup> mutants develop hallmarks of LSFC**

467 Clinical presentations of patients with LSFC identify a number of hallmarks that we examined in  
468 the *lrpprc*<sup>GBT0235/GBT0235</sup> mutants. LSFC patients exhibit metabolic/acidotic crisis followed by  
469 death within the first 2 years of life. We therefore hypothesized that our GBT protein trap allele  
470 would lead to larval lethality in zebrafish. To assess the survivability, we examined the larvae  
471 during the first 12 days of development and obtained a survival curve for the three genotypes  
472 (*lrpprc*<sup>+/+</sup>, *lrpprc*<sup>GBT0235/+</sup>, and *lrpprc*<sup>GBT0235/GBT0235</sup>). *lrpprc*<sup>GBT0235/GBT0235</sup> homozygous mutants  
473 had a similar survival percentage to that of heterozygous mutants and wild type through 6 dpf.  
474 After 6 dpf, mortality was observed in the homozygous mutant group and resulted in 100%  
475 lethality at the end of the follow-up on 12 dpf (Figure 3A). In contrast, the survival trend was  
476 similar between the heterozygous mutants and the wild type animals. The mortality rate was thus  
477 strongly affected by the *lrpprc*<sup>GBT0235/GBT0235</sup> genotype. To assess the impaired function of the

478 *lrpprc* gene, we investigated the transcript levels of mitochondrial-encoded genes. qRT-PCR  
479 analysis of these genes revealed a significant drop-off in transcript levels in the  
480 *lrpprc*<sup>GBT0235/GBT0235</sup> mutants compared to wild type larvae (Figure 3B). Expression of nuclear  
481 genes were found to be similar across the two genotypes. These findings are consistent with data  
482 observed in the previous studies that have shown a crucial role for *lrpprc* in mitochondrial  
483 mRNA stability.

484 Since onset of LSFC has multisystemic involvement, we further investigated for phenotypic  
485 defects in tissues such as muscle and liver. Survivors of the early life metabolic crises associated  
486 with LSFC often show skeletal muscle phenotypes including hypotonia, muscle weakness, and  
487 mobility defects (Sasarman et al., 2015). To investigate whether our *lrpprc*<sup>GBT0235/GBT0235</sup> mutants  
488 recapitulate this phenotype, we used birefringence—the refraction of plane polarized light  
489 through a complex, ordered structure—as a readout of skeletal muscle development and structure  
490 in 4 dpf larvae. *lrpprc*<sup>GBT0235/GBT0235</sup> larvae exemplified (Figure 4A and 4B) a decrease in  
491 integrated density and mean gray value when compared with wild type siblings (Figure 4C-4E)  
492 and, indicating a deficiency in muscle development specific to *lrpprc*<sup>GBT0235/GBT0235</sup> mutant  
493 larvae.

#### 494 ***lrpprc*<sup>GBT0235/GBT0235</sup> mutants display altered transcriptomic signature**

495 To assess genome wide transcriptional changes in *lrpprc*<sup>GBT0235/GBT0235</sup> mutants, strand specific  
496 paired end RNA sequencing (Illumina, USA) with mean read length of 150 bp were generated  
497 using HiSeq sequencing platform (Illumina, USA). Approximately 67 million reads were  
498 generated for both the *lrpprc*<sup>+/+</sup> and *lrpprc*<sup>GBT0235/GBT0235</sup> RNA preparations. Approximately 88%  
499 of the bases had a quality score of >30. The reads were aligned onto the Zv10 reference genome  
500 after filtering low quality reads with cut-off Q30 using Trimmomatic software (Bolger et al.,  
501 2014). Reads were pseudoaligned using kallisto (Bray et al., 2016) with an average mapping  
502 percentage of 79.4%, and approximately 46.18% uniquely mapped reads, and were further  
503 assembled across the genome to quantify transcript expression. Transcript level expression was  
504 summarized at gene level using Tximport (Soneson et al., 2015). To compare quantitative  
505 expression of genes across conditions, we performed differential expression analysis using  
506 DESeq2 (Love et al., 2014). The number of transcripts obtained with CPM>1 is as follows:  
507 19205 in WT and 20424 in *lrpprc* homozygous mutant respectively. Empirical cutoff of genes

508 with  $\log_2$ Fold Change  $\geq 1$  (p-value  $< 0.1$ ) and  $\log_2$ Fold Change  $\leq -1$  (p-value  $< 0.1$ ) were  
509 shortlisted as upregulated and downregulated genes respectively (Figure 5A). 825 genes were  
510 observed to be significantly upregulated and 776 genes were significantly downregulated in the  
511 *lrpprc* homozygous mutants. The human Mitocarta2.0 catalog (Calvo et al., 2016) is a list of  
512 1158 nuclear and mtDNA genes encoding for proteins localized in mitochondria. Overall, 30 and  
513 58 human orthologs of zebrafish upregulated (Supplementary Table 2) and downregulated genes  
514 (Supplementary Table 3), respectively overlapped with the database (Figure 5B).

515 Functional classification analysis of the differentially expressed genes using PANTHER (Mi et  
516 al., 2019) was performed on two bases: protein class based on the biochemical property and the  
517 other was biological process (Figure 5C and Supplementary File 1) in which a gene is involved  
518 in the cellular niche. 11% and 12% of the upregulated genes were gene-specific transcriptional  
519 regulator and metabolic interconversion enzymes, respectively. Other protein classes that were  
520 majorly represented were nucleic acid binding proteins, transporter and protein modifying  
521 enzymes. 28% and 16% of the downregulated genes fell in the category of protein class  
522 belonging to metabolic interconversion enzyme and protein modifying enzymes. Other protein  
523 classes that were majorly represented were translational protein, protein binding activity  
524 modulator, nucleic acid binding proteins and gene-specific transcriptional regulator. Most of the  
525 differential expressed genes were involved in biological processes such as metabolic process and  
526 cellular process and biological regulation. Gene set enrichment analysis predicted mitochondrial  
527 respiration and lipid metabolism pathways to be depleted in the *lrpprc*<sup>GBT0235/GBT0235</sup> mutants  
528 (Supplementary File 2). These pathways followed a similar trend as observed by the expression  
529 of mitochondrial encoded transcriptome and *lrpprc* transcript. Certain signaling pathways such  
530 as MAPK signaling, JAK-Stat signaling were also found to be enriched in these animals.

### 531 ***lrpprc*<sup>GBT0235/GBT0235</sup> mutants show altered lipid metabolism**

532 Liver is a tissue that has high energetic demand and thus mitochondria are abundant in  
533 hepatocytes. The spectrum of the expression of the *Lrpprc*-mRFP protein was well captured in  
534 the liver of the heterozygous (Figure 6A) and homozygous zebrafish mutants (Figure 6B),  
535 revealing visible hepatomegaly visible at the gross morphology level in larval animals.  
536 Interestingly, *lrpprc*<sup>GBT0235/GBT0235</sup> mutants further display a darkened liver phenotype under  
537 brightfield microscopy, reinforcing the involvement of the liver as distinguishing feature in

538 LSFC as compared to traditional Leigh Syndrome (Figure 6C). This hepatomegaly and higher  
539 contrast liver phenotype were used as the basis to investigate what role might be played by the  
540 liver in this disease. First, we used Oil Red O staining to investigate whether there was a change  
541 in the distribution of lipids in *lrpprc*<sup>GBT0235/GBT0235</sup> mutants. We found increased lipid  
542 accumulation in the livers of homozygous mutants (Figure 6E and 6G) compared to wild type  
543 (Figure 6D and 6G), suggesting the observed darkened liver phenotype could be caused by a  
544 change in the density of the stored lipids.

545 To ascertain the hepatic mitochondrial stress which leads to larval lethality (Figure 6H), electron  
546 microscopy of the hepatocytes was conducted both for heterozygous and homozygous mutants.  
547 Altered morphology of the mitochondria along with irregular shape and distribution of cristae  
548 was observed in the hepatocytes of the *lrpprc* homozygous mutants (Figure 6I and 6J).

549 Since lipid metabolism is a basic liver function dependent on mitochondrial activity, and  
550 disruption may lead to acute metabolic crises and death, we further examined how lipid profiles  
551 are altered in the null mutants using earlier described methods (Quinlivan et al., 2017) Quinlivan  
552 (2017). By coupling the feeding of a fluorescent fatty acid analog with high-performance liquid  
553 chromatography methods, we asked whether the *lrpprc* null mutants have differences in fatty  
554 acid metabolism compared to wildtype. For these experiments, we fed 6 dpf larvae for 4 hours in  
555 a 5% chicken egg yolk solution containing a fluorescent long-chain fatty acid analog  
556 (BODIPY<sup>TM</sup> FL C12) and a non-metabolizable fluorescent reagent (TopFluor<sup>®</sup> Cholesterol) to  
557 assess and correct for amount ingested. After a 12.5-hour chase in fresh media, we extracted total  
558 lipids and subjected them to HPLC with fluorescent detection. Extracted lipids were injected  
559 across a nonpolar column which separates lipid species by solubility. While chromatograph peak  
560 areas were lower overall in the homozygotes (Figure 7A), indicating less ingestion, the non-  
561 metabolizable fluorescence allows us to correct for differences (Figure 7B). After chromatograph  
562 peak areas were normalized to the non-metabolizable reagent, we found that the *lrpprc*<sup>+/+</sup>,  
563 *lrpprc*<sup>GBT0235/+</sup>, and *lrpprc*<sup>GBT0235/GBT0235</sup> larvae channeled the dietary fluorescent FA into  
564 cholesterol ester in similar levels, allowing for efficient cholesterol transport. However, we found  
565 that the null mutants incorporated twice as much of the dietary fluorescent FA into non-polar  
566 lipids compared to their wildtype siblings ( $lrpprc$ <sup>GBT0235/GBT0235</sup>/ $lrpprc$ <sup>+/+</sup> = 2.040, 95% CI =  
567 1.122–3.709, p= 0.019; (Figure 7C)).

568 We next asked whether any particular peak or peak cluster contributed to the higher levels of  
569 incorporation into non-polar lipids in the homozygous mutants and found that three of four non-  
570 polar lipid peaks or peak clusters are significantly higher (*lrpprc*<sup>GBT0235/GBT0235</sup>/*lrpprc*<sup>+/+</sup> for  
571 peaks (1), (2), and (4), respectively = 1.73 [1.02–2.94], 1.99 [1.13–3.52], and 2.91 [1.47–5.79]; p  
572 = 0.043, 0.017, and 0.002; Figure 7B). While we are unable to define the exact identities of these  
573 peaks at this time, these are likely to be largely made of triacylglycerides and diacylglycerides,  
574 the major components of nonpolar lipids along with cholesterol esters. The FA composition, as  
575 detected by HPLC-CAD, did not differ between the groups (post-normalization for total lipid  
576 levels).

### 577 **Liver-specific rescue reverses phenotypes seen in *lrpprc*<sup>GBT0235/GBT0235</sup> mutants**

578 The hepatic dysfunction seen in LSFC patients coupled with the lipid accumulation and darkened  
579 liver phenotype in GBT0235 mutants pointed to the liver as an important potential therapeutic  
580 avenue. The revertible nature of the GBT construct enables the organismal or tissue-specific  
581 reversion to wild type by removal of the cassette via Cre recombinase. Therefore, by crossing  
582 *lrpprc* mutants to *Tg(-2.8fabp10:Cre; -0.8cryaa:Venus)*<sup>S955</sup> zebrafish, we were able to create a  
583 liver-rescued *lrpprc* zebrafish, *Tg(fabp10:Cre)/lrpprc*<sup>GBT0235/GBT0235</sup> line that could then be scored  
584 for loss of liver-specific mRFP (Supplementary Figure 2) and tested for reversion of the  
585 homozygous mutant phenotypes. Following the generation of this line, we replicated the survival  
586 experiments to assess the lipid metabolism to determine whether we would see an improvement  
587 in liver function. Overall, we noted a decrease in the cholesterol and neutral lipid accumulation  
588 in the Oil Red O staining in the liver rescue conditions (Figure 6F and 6G). We also saw a  
589 reversion of the lethality in larvae with a mutant allele with 85% of those with the liver rescue  
590 surviving until at least 12 dpf (Figure 6H). Liver-specific rescue in the homozygous mutant  
591 background reverted the mitochondrial morphology restoring the regular cristae network in  
592 hepatocytes (Figure 6K and 6L).

### 593 **The altered dietary lipid metabolism in *lrpprc*<sup>GBT0235/GBT0235</sup> mutants is restored to wildtype** 594 **levels through liver-specific rescue methods**

595 To test the hypothesis that healthy liver function may exert a protective role to overall health in  
596 the context of mitochondrial disease, we rescued the liver phenotype of *lrpprc* homozygous  
597 mutants by crossing them with a liver-specific Cre recombinase transgenic line and performing

598 an in cross of the double transgenic animals. Since we found altered lipid metabolism in the  
599 *lrpprc* null mutants using HPLC methods, we asked whether the liver-specific rescue restores  
600 metabolic function to wildtype levels. Not only did the liver-specific rescued null mutants ingest  
601 as much as their wildtype and heterozygous siblings, as measured by their non-metabolizable  
602 TopFluor Cholesterol peak area, the total peak area of nonpolar lipids were lowered to that of the  
603 wildtype siblings (*lrpprc*<sup>GBT0235/GBT0235</sup>; *Tg(fabp10:Cre)/lrpprc*<sup>GBT0235/GBT0235</sup> = 0.542; 95% CI =  
604 0.357–0.823, p = 0.004; (Figure 7A)). The genetic background of the liver-specific CRE rescue  
605 did not contribute to any change in lipid levels (*Tg(fab10:Cre)lrpprc*<sup>+/+</sup>:*lrpprc*<sup>+/+</sup>] = 0.944; 95%  
606 CI = 0.640–1.391, z = -0.2934, p = 0.769; (Figure 7D)).

## 607 Discussion

608 In this study, we present a novel zebrafish model for Leigh Syndrome, French Canadian Type  
609 (LSFC) identified through the RP2 gene-breaking transposon insertional mutagenesis screen.  
610 Phenotypic assessment of this novel allele demonstrates how zebrafish serve as an excellent  
611 model to study LSFC. *Lrpprc*, shares 51% homology and conserved PPR domains with its  
612 human ortholog. Bioinformatic analysis starting with the human PPR domains with BLASTP  
613 revealed 16 predicted similar PPR domains in the zebrafish *lrpprc* gene indicating the conserved  
614 mitochondrial mRNA binding role of this gene in this vertebrate (Supplementary Figure 3). On  
615 the basis of location of the RP2 insertion, the RFP protein is predicted to fuse with the N-  
616 terminal 793 amino acids of *Lrpprc*. The spatiotemporal analysis of *Lrpprc*-mRFP shows a co-  
617 localization with an established mitochondrial marker in the caudal fin region and myocytes, as  
618 the truncated fusion proteins retains the predicted mitochondrial targeting sequence (1-77 amino  
619 acids), maintaining its predicted sub-cellular localization. We also observed remarkable  
620 ubiquitous expression patterns throughout the organism and hotspots in the liver, skeletal muscle,  
621 and eye (Figure 1B). In addition, increased expression of the fusion protein in certain tissues  
622 such as the liver, skeletal muscle, and eyes is indicative of the observation that mitochondrial  
623 density is tied to energy intensive processes like metabolism, movement, and vision. Different  
624 expression data will nevertheless help in expanding our understanding of different roles of this  
625 gene in tissue-specific niches.

626 As the pathophysiology of LSFC is not well understood, we set out to explore the physiological  
627 consequences of a *lrpprc* loss-of-function mutation *in vivo* and whether we could mimic the

628 clinical hallmarks seen in LSFC patients. Mutations in *LRPPRC* are associated with infant  
629 mortality marked by episodes of fatal acidotic crisis contributing to infant mortality (Morin et al.,  
630 1993). Similarly, homozygous *lrpprc* mutant zebrafish displayed complete larval lethality by 12  
631 dpf. However, factors triggering the crisis and associated death in both patients and animal  
632 model was initially unclear. Decreased steady state levels of mitochondrially encoded transcripts  
633 is another hallmark that is presented in patients with LRPPRC deficiency. Previous studies have  
634 implicated LRPPRC to be a critical post-transcriptional regulator of mitochondrial transcripts.  
635 LRPPRC regulates the process by the formation of a complex with SRA Stem-Loop Interacting  
636 RNA Binding Protein (SLIRP) that recruits mitochondrial polyA polymerase (MTPAP) to  
637 initiate the polyadenylation of these transcripts (Ruzzenente et al., 2012). It also acts as a global  
638 RNA chaperone stabilizing the mRNA structure and inhibits the 3' exonucleolytic mRNA  
639 degradation regulated by Polynucleotide Phosphorylase (PNPase) and Suppressor of Var1, 3  
640 (SUV3) (Chujo et al., 2012; Siira et al., 2017). Consistent with the previous *in vitro* studies  
641 (Gohil et al., 2010), expression of mitochondrial protein coding transcripts was observed to be  
642 downregulated in these homozygous mutants by more than 2-fold and were further investigated  
643 using RNASeq.

644 Decreased expression of these protein-coding transcripts is crucial for eliciting defects in the  
645 oxidative phosphorylation and mitochondrial respiratory chain. These results were in  
646 concordance with the pathways responsible for mitochondrial biogenesis and homeostasis  
647 predicted to be depleted in the *lrpprc* homozygous mutants. In addition to the depleted  
648 respiratory electron transport and complex 1 biogenesis, bioinformatic analyses also revealed  
649 depleted pyruvate metabolism, mitochondrial translation termination and hepatic mitochondrial  
650 resident pathway such as metabolism of xenobiotics by cytochrome P450. Various functions  
651 including energy production, genome maintenance, ion/metabolite homeostasis, membrane  
652 dynamics and transport of biomolecules can be attributed to approximately 1158 nuclear proteins  
653 residing in mitochondria (Calvo et al., 2016). We did note an overlap between the set of  
654 differentially expressed genes and these 1158 MitoCarta genes, suggesting an altered  
655 mitochondrial transcriptome signature. Apart from classical respiratory chain subunits, we  
656 identified some key genes from this overlapped data to be differentially expressed that were  
657 responsible in pathways such as aldehyde metabolism, fatty acid metabolism and most important,  
658 unfolded protein response. Pyruvate dehydrogenase kinase 2b (*pdk2b*) was downregulated in

659 the null mutants and is known to play an important role in the metabolism of fatty acids by  
660 inhibiting the pyruvate dehydrogenase activity which inhibits the formation of acetyl-coenzyme  
661 A. The expression of mitochondrial isoform of aldehyde dehydrogenase 2 family member,  
662 tandem duplicate 2 (*aldh2.2*) was also downregulated, possibly suggesting an interconnection  
663 between aldehyde metabolism and detoxification of lipid peroxidation by-products in  
664 mitochondria (Nene et al., 2017). *lrpprc* homozygous mutants exhibited an upregulation of  
665 chaperones proteins, heat shock protein 60 (*hsp60*) and heat shock protein (*hsp70*) that form an  
666 integral part of mitochondrial unfolded protein response. Knockdown of *lrpprc* in a mammalian  
667 cell model has been shown to elicit mitochondrial unfolded protein response triggered by nuclear  
668 encoded and mitochondrial encoded subunits of complex IV of mitochondrial electron transport  
669 chain (Kohler et al., 2015).

670 Another high energy-requisition tissue on the phenotypic spectrum of LSFC that we explored  
671 was muscle. LSFC patients display muscle defects such as hypotonia and COX deficiency  
672 (Olahova et al., 2015) and therefore, we adopted a birefringence measurement (Smith et al.,  
673 2013) to assess the muscle phenotype in our null mutants. It takes a complex and highly  
674 organized structure (like the sarcomeres in skeletal muscle) to rotate the plane polarized light and  
675 enable the visualization of birefringence. The noted decrease in birefringence in *lrpprc* mutants  
676 is most likely due to the disorganization of sarcomeres and other structures in skeletal muscle.  
677 The findings here did concur with those from the transcriptomic studies where key muscle  
678 related genes such as myogenic differentiation 1 (*myod1*) and dysferlin (*dysf*) were observed to  
679 be differentially expressed. We found *myod1*, a gene involved in muscle regeneration to be  
680 downregulated in our study. *dysf* was upregulated in *lrpprc* homozygous mutant larvae, and *Dysf*  
681 overexpression was noted in mice to cause muscle defects, including kyphosis and irregular gait  
682 (Glover et al., 2010). In addition, we observed the pathway for striated muscle contraction to also  
683 show reduced expression in *lrpprc* mutant larvae. Cysteine rich protein 1 b (*csrp1b*), the gene  
684 responsible for smooth muscle differentiation and muscle development (Henderson et al., 1999),  
685 was also found to be expressed in low levels in the *lrpprc* homozygous mutants.

686 The liver-specific dysfunction coupled with the episodes of acute metabolic crises distinguishes  
687 LSFC from classic Leigh Syndrome (LS). A previous study suggested that liver dysfunction may  
688 factor into the increased lactic acidosis and metabolic disturbances as the liver plays a key role in  
689 lactate homeostasis via the Cori cycle (Sun et al., 2017). In addition, it is important to note that



690 other basic liver functions that are dependent on mitochondrial activity such as lipid metabolism,  
691 serum detoxification, and gluconeogenesis may be key to the development of metabolic crises  
692 since they have secondary effects in other organ systems. Under TEM, mitochondrial  
693 morphology was altered in the mutants with reduced or collapsed cristae in the hepatocytes,  
694 possibly suggesting an impaired mitochondrial function. It has been observed that mitochondrial  
695 disorders increase predisposition to intracellular lipid accumulation (Morino et al., 2006).  
696 Homozygous *lrpprc* mutants manifested early onset phenotypes with hepatomegaly and  
697 progressive accumulation of dark-colored granules in the liver at 6 dpf. These granules appeared  
698 to be lipid droplets, which was validated with both Oil Red O staining and extensive *in vivo*  
699 feed/chase (i.e., metabolize) labeling lipid studies.

700 Dietary lipid metabolism studies in the homozygous mutants revealed accumulation of non-polar  
701 lipids such as triacylglycerides and diacylglycerides. Accumulation of these lipid species  
702 highlights an impaired lipid metabolism in the mutants similar to what is observed in LSFC  
703 patients (Ruiz et al., 2019). Metabolic diseases such as nonalcoholic fatty liver disease are  
704 associated with accumulation of triglyceride levels and high low-density lipoprotein levels with  
705 an underlying mitochondrial dysfunction (Simoes et al., 2018). Hepatic accumulation of such  
706 lipids may induce mitochondria to undergo dynamic changes such as depolarization and loss of  
707 ATP content (Dominguez-Perez et al., 2019). Further probing of the transcriptomics study  
708 revealed that pathways pertaining to fatty acid degradation were depleted in these null mutants.  
709 The gene encoding for acyl-coA dehydrogenase medium chain (*Acadm*), a protein that plays an  
710 important role in the fatty acid oxidation by making medium-chain acyl-CoA dehydrogenase  
711 enzyme was downregulated approximately by fold change of  $\log_2$  1.5. Catalysis of desaturation  
712 of acyl-CoAs to 2-trans-enoyl-CoAs, first step in the fatty acid beta-oxidation pathway, is  
713 regulated by acyl-CoA oxidase 1, palmitoyl (*acox1*), expression of which was reduced in mutant  
714 larvae. Fatty acid beta-oxidation is not only an exclusive mitochondrial resident pathway but also  
715 occurs in peroxisomes. Intrigued to explore that, if the abolishment of *lrpprc* had an inter-  
716 organelle effect, we analysed the expression of genes that are involved in peroxisome associated  
717 pathways. Surprisingly, MPV17 mitochondrial inner membrane protein like 2 (*mpv17l2*), one of  
718 the regulator genes for expression of antioxidant enzymes, was upregulated by fold change of  
719  $\log_2$  2. Previous study has described that its human ortholog *MPV17L2* downregulates the  
720 expression of glutathione peroxidase and catalase genes (Iida et al., 2006). This mechanism was

721 replicated in our mutants where we observed the expression of these genes to be decreased by a  
722 fold change of  $\log_2$  1.7 and  $\log_2$  1.9 respectively. Overall, our zebrafish LSFC model exhibited a  
723 dysfunctional mitochondrial signature both at the transcriptional and phenotypic level, utility of  
724 which was explored to design a genetic model therapy for LSFC associated phenotypes.

725 Because GBT-RP2 contains two loxP sites flanking the protein trap component, we could exploit  
726 this utility to rescue the organ specific function of *lrpprc*<sup>GBT0235/GBT0235</sup>. To test the hypothesis  
727 that liver function might exert a protective role in mitochondrial disease, we induced liver-  
728 specific expression of *lrpprc*<sup>GBT0235/GBT0235</sup> by removal of the GBT cassette via liver-specific Cre  
729 recombinase. Interestingly, mRFP expression was exclusively extinguished in the liver and  
730 reversion of both survival and biochemical phenotypes was observed, suggesting the liver plays a  
731 critical role in the pathology of LSFC. Remarkably, these liver-specific rescued larvae exhibited  
732 similar levels of non-polar lipids as compared to the wild type larvae, post high-fat meal  
733 underscoring the lipid homeostasis as a key therapeutic paradigm in the progression of this  
734 disease. Mitigation of abnormal mitochondrial structure with collapsed cristae was also observed  
735 in the hepatocytes of the rescued larvae. This effect may in part be due to the restoration of  
736 levels of mitochondrial transcripts and thus restoring mitochondrial mediated liver functions  
737 such as beta oxidation, fatty acid elongation, cycling of cytochrome molecules and  
738 gluconeogenesis. We anticipate that these results, together with those from the conditional  
739 knockout experiments will enhance our understanding of the function of *lrpprc* gene in hepatic  
740 lipid homeostasis and perhaps shine a light towards new therapeutic options.

741 With advances in gene editing alongside developments in both viral and non-viral vector  
742 delivery, there is hope for tissue-specific gene therapy as a potential avenue to help  
743 mitochondrial disease patients. Our findings raise the question whether advances in gene therapy  
744 could be used as a therapeutic for patients of LSFC by rescuing *lrpprc* expression in the liver.  
745 Since stability of the mitochondrial mRNA transcript, but not its sequence, is disturbed in LSFC,  
746 we postulate that inhibiting the mitochondrial RNA degradation pathway may also be a novel  
747 therapeutic avenue. Zebrafish are amenable for large-scale drug screens and are increasingly  
748 being used for this purpose due to the ease of administration of pharmaceutical compounds.  
749 Remarkably, the *lrpprc* homozygous mutants developed various hallmarks of LSFC including  
750 decreased mitochondrial transcript stability, aberrant mitochondrial morphology, hepatic

751 steatosis, increased triglyceride levels and early death. Reversion of these measures back to wild  
752 type levels could be used as a readout of therapeutic drug candidates.

### 753 **Acknowledgements**

754 The authors thank Ms. Mrunal Dehankar of the Mayo Clinic Bioinformatics core for the primary  
755 bioinformatics analyses. The authors also thank the Mayo Clinic Zebrafish Facility staff who  
756 contributed to the generation of the zebrafish line and the Mayo Clinic Microscopy Cell Analysis  
757 and Core for imaging facility. We would also like to acknowledge Mike Sepanski and Vanessa  
758 Quinlivan of the Carnegie Institution for the TEM imaging and assistance with HPLC,  
759 respectively. This work was funded by NIH grants GM63904 and DA14546, the Marriott  
760 Foundation, the Mayo Foundation, R01 DK093399 (Farber, PI). Additional support for this work  
761 was provided by the Carnegie Institution for Science Endowment and the G. Harold and Leila Y.  
762 Mathers Charitable Foundation. *Tg(-2.8fabp10:Cre; -0.8cryaa:Venus)<sup>S955</sup>* zebrafish transgenic  
763 line was a kind gift from Dr. W. Chen, Vanderbilt University, Nashville, TN, USA.  
764 *Tg(MLS:EGFP)* zebrafish transgenic line was a kind gift from Dr. S. Sivasubbu, CSIR-IGIB,  
765 India and Dr. S. Choi, Chonnam Medical School, South Korea.

### 766 **Author Contributions**

767 The paper was written by AS, MDW, JLA and SCE. Experiments were executed by AS, MDW,  
768 RLC, MRS, JLA, AJT, NI, WL, JY, YDing, YDeng with experimental guidance from XX, KJC,  
769 SAF and SCE. Data analysis was completed by AS, MDW, RLC, JLA, MRS, AJT, NI, WL.

770

## 771 **References**

- 772 Bolger AM, Lohse M, Usadel B. 2014. Trimmomatic: a flexible trimmer for Illumina sequence  
773 data. *Bioinformatics* **30**:2114–2120. doi:10.1093/bioinformatics/btu170
- 774 Bray NL, Pimentel H, Melsted P, Pachter L. 2016. Near-optimal probabilistic RNA-seq  
775 quantification. *Nat Biotechnol* **34**:525–527. doi:10.1038/nbt.3519
- 776 Broughton RE, Milam JE, Roe BA. 2001. The complete sequence of the zebrafish (*Danio rerio*)  
777 mitochondrial genome and evolutionary patterns in vertebrate mitochondrial DNA. *Genome*  
778 *Res.* doi:10.1101/gr.156801
- 779 Byrnes J, Ganetzky R, Lightfoot R, Tzeng M, Nakamaru-Ogiso E, Seiler C, Falk MJ. 2018.  
780 Pharmacologic modeling of primary mitochondrial respiratory chain dysfunction in  
781 zebrafish. *Neurochem Int.* doi:10.1016/j.neuint.2017.07.008
- 782 Calvo SE, Clauser KR, Mootha VK. 2016. MitoCarta2.0: an updated inventory of mammalian  
783 mitochondrial proteins. *Nucleic Acids Res* **44**:D1251-7. doi:10.1093/nar/gkv1003
- 784 Carten JD, Bradford MK, Farber SA. 2011. Visualizing digestive organ morphology and  
785 function using differential fatty acid metabolism in live zebrafish. *Dev Biol.*  
786 doi:10.1016/j.ydbio.2011.09.010
- 787 Chinnery PF, Elliott HR, Hudson G, Samuels DC, Relton CL. 2012. Epigenetics, epidemiology  
788 and mitochondrial DNA diseases. *Int J Epidemiol* **41**:177–187. doi:10.1093/ije/dyr232
- 789 Chujo T, Ohira T, Sakaguchi Y, Goshima N, Nomura N, Nagao A, Suzuki T. 2012.  
790 LRPPRC/SLIRP suppresses PNPase-mediated mRNA decay and promotes polyadenylation  
791 in human mitochondria. *Nucleic Acids Res* **40**:8033–8047. doi:10.1093/nar/gks506
- 792 Clark KJ, Balciunas D, Pogoda H-M, Ding Y, Westcot SE, Bedell VM, Greenwood TM, Urban  
793 MD, Skuster KJ, Petzold AM, Ni J, Nielsen AL, Patowary A, Scaria V, Sivasubbu S, Xu X,  
794 Hammerschmidt M, Ekker SC. 2011. In vivo protein trapping produces a functional  
795 expression codex of the vertebrate proteome. *Nat Methods* **8**:506–515.  
796 doi:10.1038/nmeth.1606
- 797 Cui J, Wang L, Ren X, Zhang Y, Zhang H. 2019. LRPPRC: A Multifunctional Protein Involved  
798 in Energy Metabolism and Human Disease. *Front Physiol.* doi:10.3389/fphys.2019.00595
- 799 Cuillerier A, Honarmand S, Cadete VJJ, Ruiz M, Forest A, Deschenes S, Beauchamp C, Charron  
800 G, Rioux JD, Des Rosiers C, Shoubbridge EA, Burelle Y. 2017. Loss of hepatic LRPPRC  
801 alters mitochondrial bioenergetics, regulation of permeability transition and trans-  
802 membrane ROS diffusion. *Hum Mol Genet* **26**:3186–3201. doi:10.1093/hmg/ddx202
- 803 Debray F-G, Morin C, Janvier A, Villeneuve J, Maranda B, Laframboise R, Lacroix J, Decarie J-  
804 C, Robitaille Y, Lambert M, Robinson BH, Mitchell GA. 2011. LRPPRC mutations cause a  
805 phenotypically distinct form of Leigh syndrome with cytochrome c oxidase deficiency. *J*

- 806 *Med Genet* **48**:183–189. doi:10.1136/jmg.2010.081976
- 807 Dominguez-Perez M, Simoni-Nieves A, Rosales P, Nuno-Lambarri N, Rosas-Lemus M, Souza  
808 V, Miranda RU, Bucio L, Uribe Carvajal S, Marquardt JU, Seo D, Gomez-Quiroz LE,  
809 Gutierrez-Ruiz MC. 2019. Cholesterol burden in the liver induces mitochondrial dynamic  
810 changes and resistance to apoptosis. *J Cell Physiol* **234**:7213–7223. doi:10.1002/jcp.27474
- 811 Flinn L, Mortiboys H, Volkmann K, Kster RW, Ingham PW, Bandmann O. 2009. Complex i  
812 deficiency and dopaminergic neuronal cell loss in parkin-deficient zebrafish (*Danio rerio*).  
813 *Brain*. doi:10.1093/brain/awp108
- 814 Glover LE, Newton K, Krishnan G, Bronson R, Boyle A, Krivickas LS, Brown RHJ. 2010.  
815 Dysferlin overexpression in skeletal muscle produces a progressive myopathy. *Ann Neurol*  
816 **67**:384–393. doi:10.1002/ana.21926
- 817 Gohil VM, Nilsson R, Belcher-Timme CA, Luo B, Root DE, Mootha VK. 2010. Mitochondrial  
818 and nuclear genomic responses to loss of LRPPRC expression. *J Biol Chem* **285**:13742–  
819 13747. doi:10.1074/jbc.M109.098400
- 820 Gorman GS, Chinnery PF, DiMauro S, Hirano M, Koga Y, McFarland R, Suomalainen A,  
821 Thorburn DR, Zeviani M, Turnbull DM. 2016. Mitochondrial diseases. *Nat Rev Dis Prim*  
822 **2**:16080. doi:10.1038/nrdp.2016.80
- 823 Green DR. 1998. Apoptotic pathways: the roads to ruin. *Cell* **94**:695–698. doi:10.1016/s0092-  
824 8674(00)81728-6
- 825 Henderson JR, Macalma T, Brown D, Richardson JA, Olson EN, Beckerle MC. 1999. The LIM  
826 protein, CRP1, is a smooth muscle marker. *Dev Dyn* **214**:229–238. doi:10.1002/(SICI)1097-  
827 0177(199903)214:3<229::AID-AJA6>3.0.CO;2-S
- 828 Ichino N, Serres M, Urban R, Urban M, Schaeffbauer K, Greif L, Varshney GK, Skuster KJ,  
829 McNulty M, Daby C, Wang Y, Liao H, El-Rass S, Ding Y, Liu W, Schimmenti LA,  
830 Sivasubbu S, Balciunas D, Hammerschmidt M, Farber SA, Wen X-Y, Xu X, McGrail M,  
831 Essner JJ, Burgess S, Clark KJ, Ekker SC. 2019. The Vertebrate Codex Gene Breaking  
832 Protein Trap Library For Genomic Discovery and Disease Modeling Applications. *bioRxiv*  
833 630236. doi:10.1101/630236
- 834 Iida R, Yasuda T, Tsubota E, Takatsuka H, Matsuki T, Kishi K. 2006. Human Mpv17-like  
835 protein is localized in peroxisomes and regulates expression of antioxidant enzymes.  
836 *Biochem Biophys Res Commun* **344**:948–954. doi:10.1016/j.bbrc.2006.04.008
- 837 Kim MJ, Kang KH, Kim CH, Choi SY. 2008. Real-time imaging of mitochondria in transgenic  
838 zebrafish expressing mitochondrially targeted GFP. *Biotechniques*. doi:10.2144/000112909
- 839 Kim S-H, Scott SA, Bennett MJ, Carson RP, Fessel J, Brown HA, Ess KC. 2013. Multi-organ  
840 abnormalities and mTORC1 activation in zebrafish model of multiple acyl-CoA  
841 dehydrogenase deficiency. *PLoS Genet* **9**:e1003563. doi:10.1371/journal.pgen.1003563

- 842 Kohler F, Muller-Rischart AK, Conrardt B, Rolland SG. 2015. The loss of LRPPRC function  
843 induces the mitochondrial unfolded protein response. *Aging (Albany NY)* **7**:701–717.  
844 doi:10.18632/aging.100812
- 845 Lambert CJ, Freshner BC, Chung A, Stevenson TJ, Bowles DM, Samuel R, Gale BK,  
846 Bonkowsky JL. 2018. An automated system for rapid cellular extraction from live zebrafish  
847 embryos and larvae: Development and application to genotyping. *PLoS One* **13**:e0193180.  
848 doi:10.1371/journal.pone.0193180
- 849 Lieschke GJ, Currie PD. 2007. Animal models of human disease: Zebrafish swim into view. *Nat*  
850 *Rev Genet.* doi:10.1038/nrg2091
- 851 Liu L, McKeehan WL. 2002. Sequence analysis of LRPPRC and its SEC1 domain interaction  
852 partners suggests roles in cytoskeletal organization, vesicular trafficking, nucleocytosolic  
853 shuttling, and chromosome activity. *Genomics.* doi:10.1006/geno.2001.6679
- 854 Love MI, Huber W, Anders S. 2014. Moderated estimation of fold change and dispersion for  
855 RNA-seq data with DESeq2. *Genome Biol* **15**:550. doi:10.1186/s13059-014-0550-8
- 856 Manna S. 2015. An overview of pentatricopeptide repeat proteins and their applications.  
857 *Biochimie.* doi:10.1016/j.biochi.2015.04.004
- 858 McFarland R, Taylor RW, Turnbull DM. 2010. A neurological perspective on mitochondrial  
859 disease. *Lancet Neurol* **9**:829–840. doi:10.1016/S1474-4422(10)70116-2
- 860 Mi H, Muruganujan A, Huang X, Ebert D, Mills C, Guo X, Thomas PD. 2019. Protocol Update  
861 for large-scale genome and gene function analysis with the PANTHER classification system  
862 (v.14.0). *Nat Protoc* **14**:703–721. doi:10.1038/s41596-019-0128-8
- 863 Mili S, Piñol-Roma S. 2003. LRP130, a Pentatricopeptide Motif Protein with a Noncanonical  
864 RNA-Binding Domain, Is Bound In Vivo to Mitochondrial and Nuclear RNAs. *Mol Cell*  
865 *Biol.* doi:10.1128/mcb.23.14.4972-4982.2003
- 866 Mootha VK, Lepage P, Miller K, Bunkenborg J, Reich M, Hjerrild M, Delmonte T, Villeneuve  
867 A, Sladek R, Xu F, Mitchell GA, Morin C, Mann M, Hudson TJ, Robinson B, Rioux JD,  
868 Lander ES. 2003. Identification of a gene causing human cytochrome c oxidase deficiency  
869 by integrative genomics. *Proc Natl Acad Sci U S A* **100**:605–610.  
870 doi:10.1073/pnas.242716699
- 871 Moraes CT, Ricci E, Bonilla E, DiMauro S, Schon EA. 1992. The mitochondrial  
872 tRNA(Leu(UUR)) mutation in mitochondrial encephalomyopathy, lactic acidosis, and  
873 strokelike episodes (MELAS): genetic, biochemical, and morphological correlations in  
874 skeletal muscle. *Am J Hum Genet* **50**:934–949.
- 875 Morin C, Mitchell G, Laroche J, Lambert M, Ogier H, Robinson BH, De Braekeleer M. 1993.  
876 Clinical, metabolic, and genetic aspects of cytochrome C oxidase deficiency in Saguenay-  
877 Lac-Saint-Jean. *Am J Hum Genet* **53**:488–496.

- 878 Morino K, Petersen KF, Shulman GI. 2006. Molecular mechanisms of insulin resistance in  
879 humans and their potential links with mitochondrial dysfunction. *Diabetes* **55 Suppl 2**:S9–  
880 S15. doi:10.2337/db06-S002
- 881 Nene A, Chen C-H, Disatnik M-H, Cruz L, Mochly-Rosen D. 2017. Aldehyde dehydrogenase 2  
882 activation and coevolution of its epsilonPKC-mediated phosphorylation sites. *J Biomed Sci*  
883 **24**:3. doi:10.1186/s12929-016-0312-x
- 884 Newsholme P, Gaudel C, Krause M. 2012. Mitochondria and diabetes. An intriguing  
885 pathogenetic role. *Adv Exp Med Biol* **942**:235–247. doi:10.1007/978-94-007-2869-1\_10
- 886 Olahova M, Hardy SA, Hall J, Yarham JW, Haack TB, Wilson WC, Alston CL, He L,  
887 Aznauryan E, Brown RM, Brown GK, Morris AAM, Mundy H, Broomfield A, Barbosa IA,  
888 Simpson MA, Deshpande C, Moeslinger D, Koch J, Stettner GM, Bonnen PE, Prokisch H,  
889 Lightowlers RN, McFarland R, Chrzanowska-Lightowlers ZMA, Taylor RW. 2015.  
890 LRPPRC mutations cause early-onset multisystem mitochondrial disease outside of the  
891 French-Canadian population. *Brain* **138**:3503–3519. doi:10.1093/brain/awv291
- 892 Plucińska G, Paquet D, Hruscha A, Godinho L, Haass C, Schmid B, Misgeld T. 2012. In vivo  
893 imaging of disease-related mitochondrial dynamics in a vertebrate model system. *J*  
894 *Neurosci*. doi:10.1523/JNEUROSCI.1327-12.2012
- 895 Quinlivan VH, Wilson MH, Ruzicka J, Farber SA. 2017. An HPLC-CAD/fluorescence  
896 lipidomics platform using fluorescent fatty acids as metabolic tracers. *J Lipid Res* **58**:1008–  
897 1020. doi:10.1194/jlr.D072918
- 898 Rahman S, Blok RB, Dahl HH, Danks DM, Kirby DM, Chow CW, Christodoulou J, Thorburn  
899 DR. 1996. Leigh syndrome: clinical features and biochemical and DNA abnormalities. *Ann*  
900 *Neurol* **39**:343–351. doi:10.1002/ana.410390311
- 901 Rizzuto R, Marchi S, Bonora M, Aguiari P, Bononi A, De Stefani D, Giorgi C, Leo S, Rimessi  
902 A, Siviero R, Zecchini E, Pinton P. 2009. Ca(2+) transfer from the ER to mitochondria:  
903 when, how and why. *Biochim Biophys Acta* **1787**:1342–1351.  
904 doi:10.1016/j.bbabo.2009.03.015
- 905 Ruiz M, Cuillerier A, Daneault C, Deschenes S, Frayne IR, Bouchard B, Forest A, Legault JT,  
906 Vaz FM, Rioux JD, Burelle Y, Des Rosiers C. 2019. Lipidomics unveils lipid  
907 dyshomeostasis and low circulating plasmalogens as biomarkers in a monogenic  
908 mitochondrial disorder. *JCI insight* **4**. doi:10.1172/jci.insight.123231
- 909 Ruzzenente B, Metodiev MD, Wredenberg A, Bratic A, Park CB, Camara Y, Milenkovic D,  
910 Zickermann V, Wibom R, Hultenby K, Erdjument-Bromage H, Tempst P, Brandt U,  
911 Stewart JB, Gustafsson CM, Larsson N-G. 2012. LRPPRC is necessary for polyadenylation  
912 and coordination of translation of mitochondrial mRNAs. *EMBO J* **31**:443–456.  
913 doi:10.1038/emboj.2011.392
- 914 Sabharwal A, Campbell JM, WareJoncas Z, Wishman M, Ata H, Liu W, Ichino N, Bergren JD,

- 915 Urban MD, Urban R, Poshusta TL, Ding Y, Xu X, Clark KJ, Ekker SC. 2019a. A primer  
916 genetic toolkit for exploring mitochondrial biology and disease using zebrafish. *bioRxiv*.  
917 doi:10.1101/542084
- 918 Sabharwal A, Sharma D, Vellarikkal SK, Jayarajan R, Verma A, Senthivel V, Scaria V,  
919 Sivasubbu S. 2019b. Organellar transcriptome sequencing reveals mitochondrial  
920 localization of nuclear encoded transcripts. *Mitochondrion* **46**:59–68.  
921 doi:10.1016/j.mito.2018.02.007
- 922 Sasarman F, Nishimura T, Antonicka H, Weraarpachai W, Shoubridge EA. 2015. Tissue-specific  
923 responses to the LRPPRC founder mutation in French Canadian Leigh Syndrome. *Hum Mol*  
924 *Genet* **24**:480–491. doi:10.1093/hmg/ddu468
- 925 Siira SJ, Spahr H, Shearwood A-MJ, Ruzzenente B, Larsson N-G, Rackham O, Filipovska A.  
926 2017. LRPPRC-mediated folding of the mitochondrial transcriptome. *Nat Commun* **8**:1532.  
927 doi:10.1038/s41467-017-01221-z
- 928 Simoes ICM, Fontes A, Pinton P, Zischka H, Wieckowski MR. 2018. Mitochondria in non-  
929 alcoholic fatty liver disease. *Int J Biochem Cell Biol* **95**:93–99.  
930 doi:10.1016/j.biocel.2017.12.019
- 931 Smith LL, Beggs AH, Gupta VA. 2013. Analysis of skeletal muscle defects in larval zebrafish by  
932 birefringence and touch-evoked escape response assays. *J Vis Exp*. doi:10.3791/50925
- 933 Soneson C, Love MI, Robinson MD. 2015. Differential analyses for RNA-seq: transcript-level  
934 estimates improve gene-level inferences. *F1000Research* **4**:1521.  
935 doi:10.12688/f1000research.7563.2
- 936 Song Y, Selak MA, Watson CT, Coutts C, Scherer PC, Panzer JA, Gibbs S, Scott MO, Willer G,  
937 Gregg RG, Ali DW, Bennett MJ, Balice-Gordon RJ. 2009. Mechanisms underlying  
938 metabolic and neural defects in zebrafish and human multiple Acyl-CoA dehydrogenase  
939 deficiency (MADD). *PLoS One*. doi:10.1371/journal.pone.0008329
- 940 Spinelli JB, Haigis MC. 2018. The multifaceted contributions of mitochondria to cellular  
941 metabolism. *Nat Cell Biol* **20**:745–754. doi:10.1038/s41556-018-0124-1
- 942 Steele SL, Prykhodzhiy S V., Berman JN. 2014. Zebrafish as a model system for mitochondrial  
943 biology and diseases. *Transl Res*. doi:10.1016/j.trsl.2013.08.008
- 944 Sterky FH, Ruzzenente B, Gustafsson CM, Samuelsson T, Larsson N-G. 2010. LRPPRC is a  
945 mitochondrial matrix protein that is conserved in metazoans. *Biochem Biophys Res*  
946 *Commun* **398**:759–764. doi:10.1016/j.bbrc.2010.07.019
- 947 Stockel D, Kehl T, Trampert P, Schneider L, Backes C, Ludwig N, Gerasch A, Kaufmann M,  
948 Gessler M, Graf N, Meese E, Keller A, Lenhof H-P. 2016. Multi-omics enrichment analysis  
949 using the GeneTrail2 web service. *Bioinformatics* **32**:1502–1508.  
950 doi:10.1093/bioinformatics/btv770



- 951 Sun S, Li H, Chen J, Qian Q. 2017. Lactic Acid: No Longer an Inert and End-Product of  
952 Glycolysis. *Physiology (Bethesda)* **32**:453–463. doi:10.1152/physiol.00016.2017
- 953 Tiku V, Tan M-W, Dikic I. 2020. Mitochondrial Functions in Infection and Immunity. *Trends*  
954 *Cell Biol* **30**:263–275. doi:10.1016/j.tcb.2020.01.006
- 955 Urrutia PJ, Mena NP, Nunez MT. 2014. The interplay between iron accumulation, mitochondrial  
956 dysfunction, and inflammation during the execution step of neurodegenerative disorders.  
957 *Front Pharmacol* **5**:38. doi:10.3389/fphar.2014.00038
- 958 Vafai SB, Mootha VK. 2012. Mitochondrial disorders as windows into an ancient organelle.  
959 *Nature* **491**:374–383. doi:10.1038/nature11707
- 960 Valero T. 2014. Mitochondrial biogenesis: pharmacological approaches. *Curr Pharm Des.*  
961 doi:10.2174/138161282035140911142118
- 962 Wallace DC. 2012. Mitochondria and cancer. *Nat Rev Cancer* **12**:685–698. doi:10.1038/nrc3365
- 963 Wilkinson RN, Elworthy S, Ingham PW, van Eeden FJM. 2017. Fin clipping and genotyping  
964 embryonic zebrafish at 3 days post-fertilization. *Biotechniques*. doi:10.2144/000114509
- 965 Wilson MH, Rajan S, Danoff A, White RJ, Hensley MR, Quinlivan VH, Thierer JH, Busch-  
966 Nentwich EM, Hussain MM, Farber SA. 2019. A missense mutation dissociates triglyceride  
967 and phospholipid transfer activities in zebrafish and human microsomal triglyceride transfer  
968 protein. *bioRxiv* 701813. doi:10.1101/701813
- 969 Xu F, Addis JBL, Cameron JM, Robinson BH. 2012. LRPPRC mutation suppresses cytochrome  
970 oxidase activity by altering mitochondrial RNA transcript stability in a mouse model.  
971 *Biochem J* **441**:275–283. doi:10.1042/BJ20110985
- 972 Zeituni EM, Wilson MH, Zheng X, Iglesias PA, Sepanski MA, Siddiqi MA, Anderson JL, Zheng  
973 Y, Farber SA. 2016. Endoplasmic reticulum lipid flux influences enterocyte nuclear  
974 morphology and lipid-dependent transcriptional responses. *J Biol Chem.*  
975 doi:10.1074/jbc.M116.749358
- 976

## 977 **Figures Legends**

978 **Figure 1: GBT mutagenesis generates a novel zebrafish model of LSFC.** (A) Schematic of  
979 human and zebrafish LRPPRC proteins with highlighted PPR domains (denoted by P). (B)  
980 Schematic of the integration event of GBT vector RP2.1 with 5' protein trap and 3' exon trap  
981 cassettes. The RP2.1 cassette was integrated in the intronic region 22 of the *lrpprc* genomic locus  
982 on chromosome 13. ITR, inverted terminal repeat; SA, loxP; Cre recombinase recognition  
983 sequence, splice acceptor; \*mRFP' AUG-less mRFP sequence; poly (A)+, polyadenylation  
984 signal; red octagon, extra transcriptional terminator and putative border element;  $\beta$ -act, carp beta-  
985 actin enhancer, SD, splice donor

986 **Figure 2: Spatiotemporal expression of *Lrpprc*-mRFP in GBT0235 mutants.** (A)  
987 Representative images of 6dpf *lrpprc* heterozygous mutants (*lrpprc*<sup>GBT0235/+</sup>) with bright RFP  
988 expression in the liver and gut (magnification-5X; Scale bar: 200  $\mu$ m). (B) Relative expression of  
989 *lrpprc* transcript in wild type (denoted by '+/+'; *lrpprc*<sup>+/+</sup>) and homozygous mutant larvae  
990 (denoted by '-/-'; *lrpprc*<sup>GBT0235/GBT0235</sup>) (p-value <0.001). (C) 2 dpf *Tg(MLS:EGFP)*  
991 *lrpprc*<sup>GBT0235/+</sup> was used to observe the sub-cellular localization of the *lrpprc* protein in the caudal  
992 fin region. Mitochondria were detected with fluorescence microscopy under GFP filter while the  
993 truncated *lrpprc*:mRFP fusion protein was detected using an RFP filter.

994 **Figure 3: *lrpprc* homozygous zebrafish mutants recapitulate the hallmarks of Leigh**  
995 **syndrome French-Canadian type.** (A) Survival percentage of three genotypes, wild type  
996 *lrpprc*<sup>+/+</sup>, heterozygous- *lrpprc*<sup>GBT0235/+</sup> and homozygous mutants- *lrpprc*<sup>GBT0235/GBT0235</sup>. Data is  
997 represented from independent experiments (p-value <0.05). (B) Relative expression of  
998 mitochondrial encoded transcripts in the homozygous and wild type siblings assessed by qRT-  
999 PCR. Nuclear encoded genes, *rps6kb1* and *nfe2l2a* were used as control. Black circle represent  
1000 wild type and red triangle represent homozygous mutants. Mitochondrial transcripts were  
1001 normalized to *eefla1ll* transcript levels. Error bars are represented as SD. (For *mt-nd1*: p-  
1002 value<0.05, for *mt-nd6*, *mt-cyb*, *mt-atp8*: p-value<0.01, for *mt-nd4*, *mt-col*, *mt-atp6*: p-  
1003 value<0.001, for *rps6kb1* and *nfe2l2a*: p-value –not significant).

1004 **Figure 4: *lrpprc* homozygous mutants display decreased birefringence.** (A-B) Representative  
1005 Birefringence images of wildtype (A) and *lrpprc*<sup>GBT0235/GBT0235</sup> mutants (B). (C-E) The images

1006 and graphs in the figure show the area of region of interest (ROI) (C), mean gray value (D) and  
1007 integrated density (E) between wild type and *lrpprc*<sup>GBT0235/GBT0235</sup> mutants of the birefringence  
1008 signal. *lrpprc*<sup>GBT0235/GBT0235</sup> mutants display similar birefringence area but a decrease in mean  
1009 gray value (p value<0.0001) and integrated density (p value=0.001). Each individual data point  
1010 represents a single animal. Each parental pair represents biological replicate.

1011 **Figure 5: RNAseq of *lrpprc*<sup>GBT0235/GBT0235</sup> homozygous mutants.** (A) Volcano plot of  
1012 differentially expressed genes in the homozygous mutants. Logarithm (base 2) of fold change is  
1013 represented on the x-axis and logarithm of p-value (base 10) is represented on y-axis. Red dot  
1014 signifies the significantly differentially expressed genes and black dots represent the non-  
1015 significantly differentially expressed genes between the 6 days post fertilization homozygous  
1016 *lrpprc*<sup>GBT0235/GBT0235</sup> and wild-type *lrpprc*<sup>+/+</sup> larvae. (B) Heat map visualization of expression of  
1017 zebrafish orthologs for human Mitocarta genes. Gradient color scale represents the log<sub>2</sub>CPM  
1018 value obtained for each of the zebrafish mitochondrial orthologs in the two data sets. (C)  
1019 PANTHER classification for all the significantly differentially expressed genes in the  
1020 homozygous mutant according to protein class and biological process. Each histogram represents  
1021 the percentage of genes falling in each of the category.

1022 **Figure 6: Liver plays an important role in the pathology of LSFC and genetic liver specific**  
1023 **rescue rescues the lipid defect and mortality in *lrpprc* homozygous mutant larvae.** (A-B)  
1024 Representative images of the livers of 6 dpf old heterozygous (A) *lrpprc*<sup>GBT0235/+</sup> and homozygous  
1025 (B) *lrpprc*<sup>GBT0235/GBT0235</sup> mutants at 40X (Scale bar: 50 μm). (C) Brightfield image of 6 dpf wild  
1026 type, *lrpprc*<sup>+/+</sup> and homozygous *lrpprc*<sup>GBT0235/GBT0235</sup> mutants. Homozygous mutants display dark  
1027 liver phenotype as compared to the wild type controls. Region showing dark liver has been  
1028 marked by asterisk. (D-F) Oil red O staining for assessment of lipid accumulation in the 8 dpf  
1029 mutants and 8 dpf rescued larvae. Increased lipid accumulation was observed in the homozygous  
1030 mutants (E) compared to wild type larvae (D). In the liver-specific rescued homozygous *lrpprc*  
1031 mutants *Tg(fabp10:Cre)lrpprc*<sup>GBT0235/GBT0235</sup>, no accumulation of lipids was observed (F). (G)  
1032 The graph show increase in the area of region of interest (ROI) for the accumulated lipids,  
1033 between wild type and *lrpprc*<sup>GBT0235/GBT0235</sup> mutants, indicating a decrease in the lipid content (p  
1034 value < 0.05) (Scale bar; G-I: 20 px). The levels are restored in homozygous rescued larvae (p  
1035 value < 0.05). (H) Liver -specific rescued mutants display an improved survival rate beyond 11  
1036 dpf. (I-L) Representative electron micrographs of the mitochondria in hepatocytes for 8dpf

1037 *lrpprc* wild type (**I**), *lrpprc* homozygous mutants (J) and liver-specific *lrpprc* rescued larvae (**K**  
1038 **and L**). Altered mitochondrial morphology displayed by *lrpprc*<sup>GBT0235/GBT0235</sup> (J) is improved in  
1039 the rescued mutants, *Tg(fabp10:Cre)lrpprc*<sup>GBT0235/GBT0235</sup> (K and L) (Scale bar; A-C: 0.5  $\mu$ m).

1040 **Figure 7: Genetic liver-specific rescue of altered dietary lipid metabolism in *lrpprc***  
1041 **homozygous mutant larvae. (A-D)** HPLC studies reveal that *lrpprc* homozygous mutants have  
1042 double the level of nonpolar lipids compared to their wildtype siblings. **(A)** Representative  
1043 chromatographs are shown: lipid extractions from whole wildtype larvae (top) and whole *lrpprc*  
1044 homozygous mutant larvae (middle). Peaks represent different lipid species and are quantified by  
1045 peak area. Measuring the peak of the non-metabolizable fluorescent reagent (22–23 min elution  
1046 time) confirms that the *lrpprc*<sup>GBT0235/GBT0235</sup> mutants ingest less than their wildtype siblings and  
1047 provides a normalizer for the other measured peaks. Liver-specific rescue of *lrpprc*<sup>GBT0235/GBT0235</sup>  
1048 mutants restores nonpolar lipid levels to wildtype levels liver-specific rescued homozygous  
1049 mutant larvae (bottom). All peaks were normalized to the peak marked by asterisk(\*) reflecting  
1050 non-metabolizable fluorescent reagent (amount ingested). **(B)** Levels of several nonpolar lipid  
1051 species are higher in *lrpprc* homozygous mutants. Excerpts from representative chromatographs,  
1052 wildtype larvae (top) and *lrpprc* homozygous mutant larvae (bottom); peaks shown have been  
1053 normalized to account for amount ingested. Peaks or peak areas (labeled as 1-4) were  
1054 individually analyzed for contribution to the overall higher NPL level in *lrpprc* homozygous  
1055 mutants compared to their wildtype siblings. **(C)** 95% CI plot: *lrpprc*<sup>GBT0235/GBT0235</sup> generated  
1056 2.04 times more non-polar lipids compared to their wildtype siblings  
1057 (*lrpprc*<sup>GBT0235/GBT0235</sup>/*lrpprc*<sup>+/+</sup> = 2.040, 95% CI = 1.122–3.709, p= 0.019). **(D)** 95% CI plot:  
1058 *Tg(fabp10:Cre)lrpprc*<sup>GBT0235/GBT0235</sup> restored the levels of non-polar lipids as compared to  
1059 *lrpprc*<sup>GBT0235/GBT0235</sup> homozygous mutants. PL=phospholipids; NPL=nonpolar lipids  
1060 (triacylglycerides, diacylglycerides); CE=cholesteryl ester; NM=normalizer for amount eaten.

1061 **Figures:**

1062 **Figure 1:**

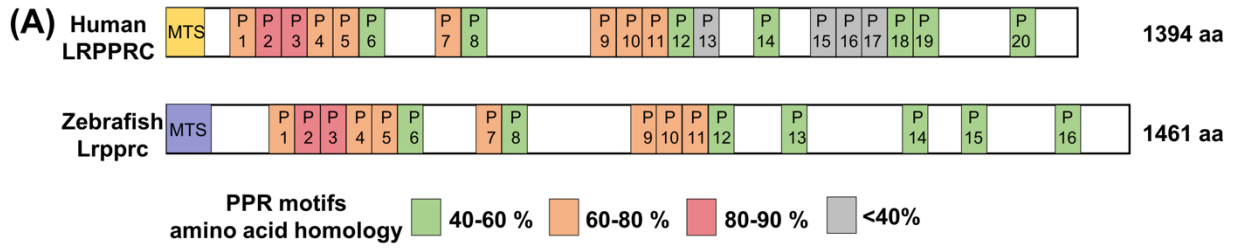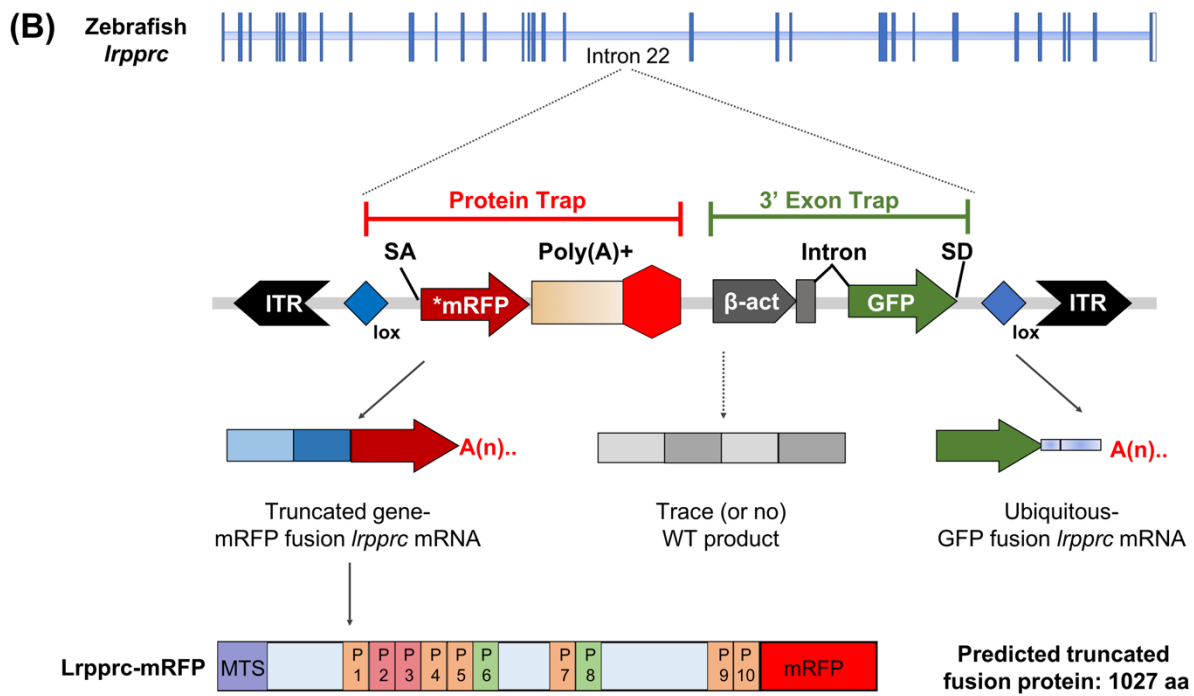

1063

1064

1065 **Figure 2:**

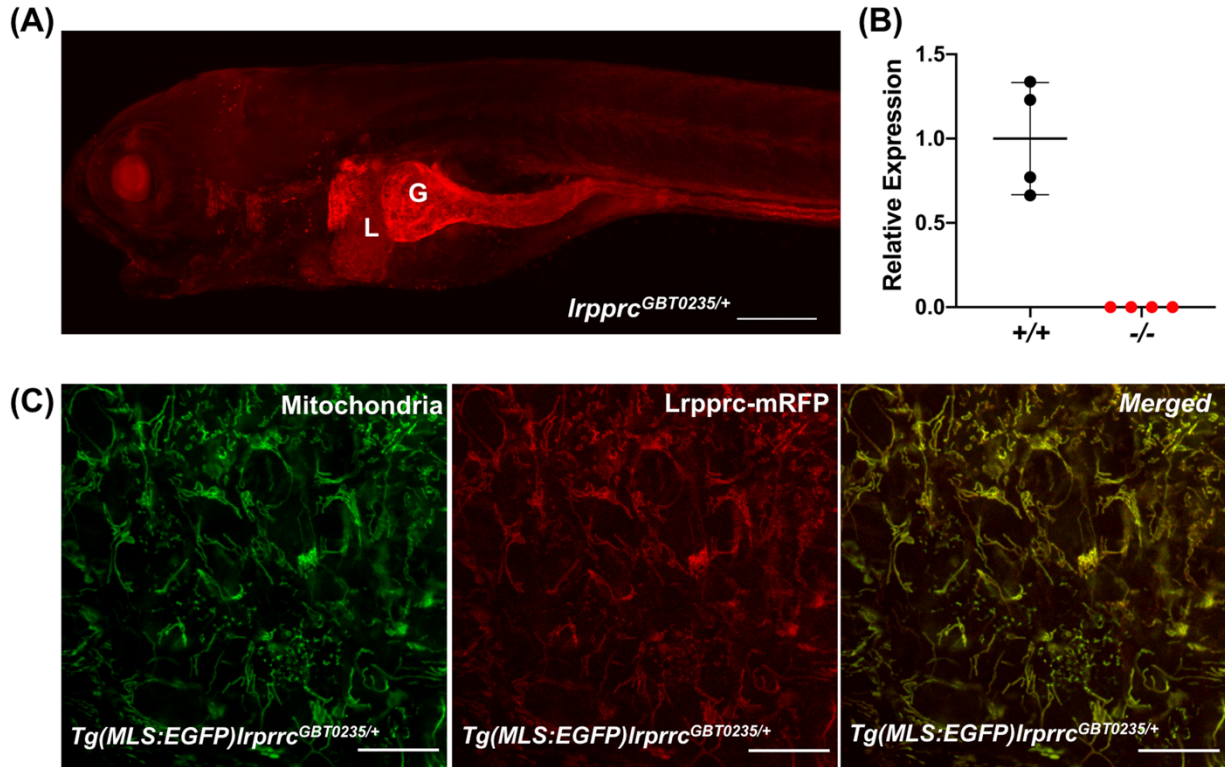

1066

1067 **Figure 3:**

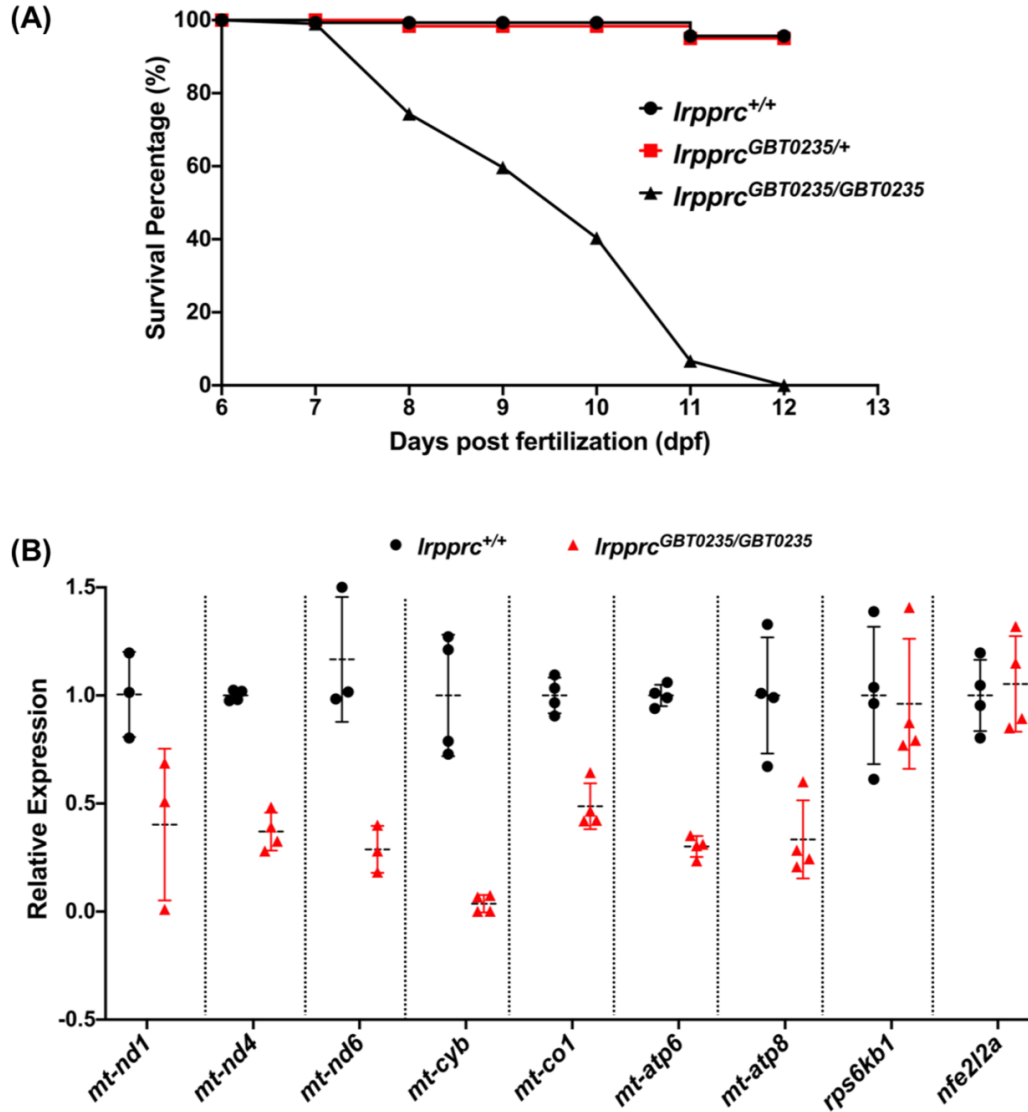

1068

1069 Figure 4:

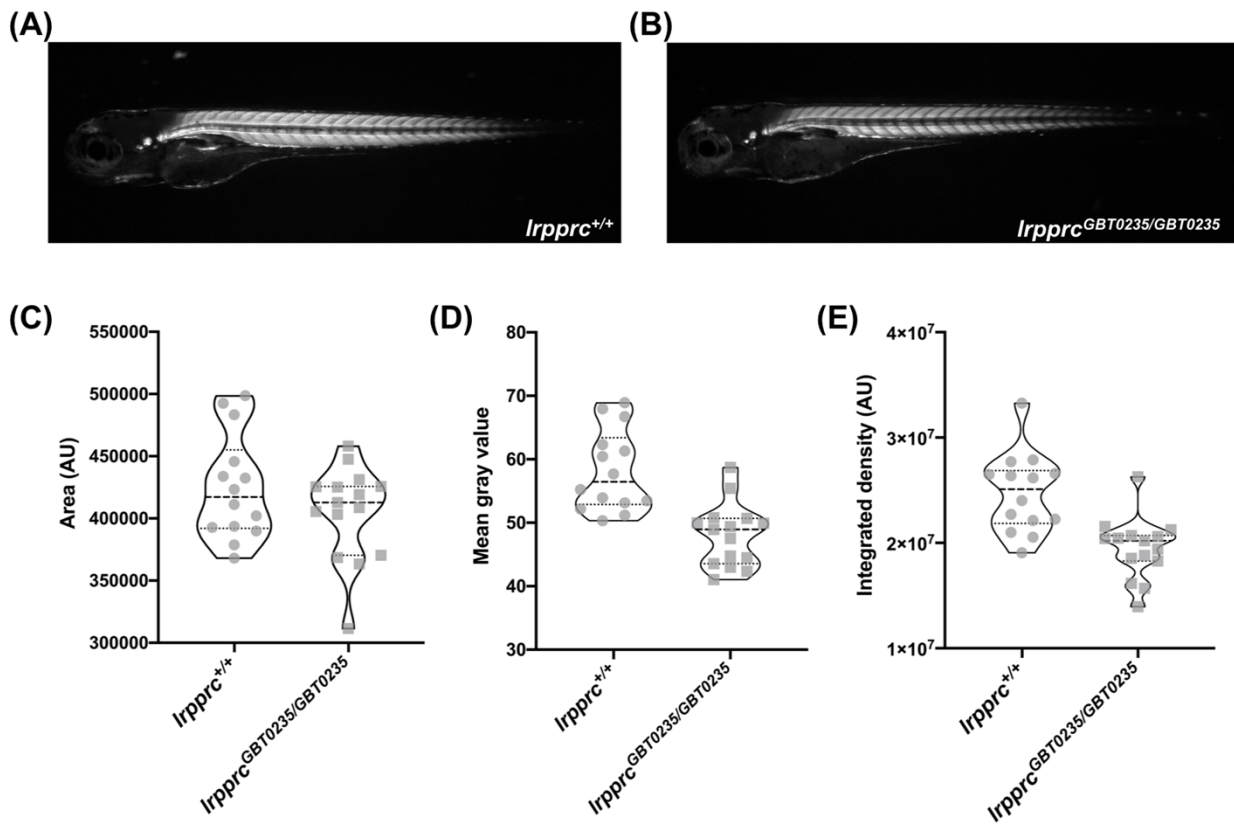

1070



1071 **Figure 5:**

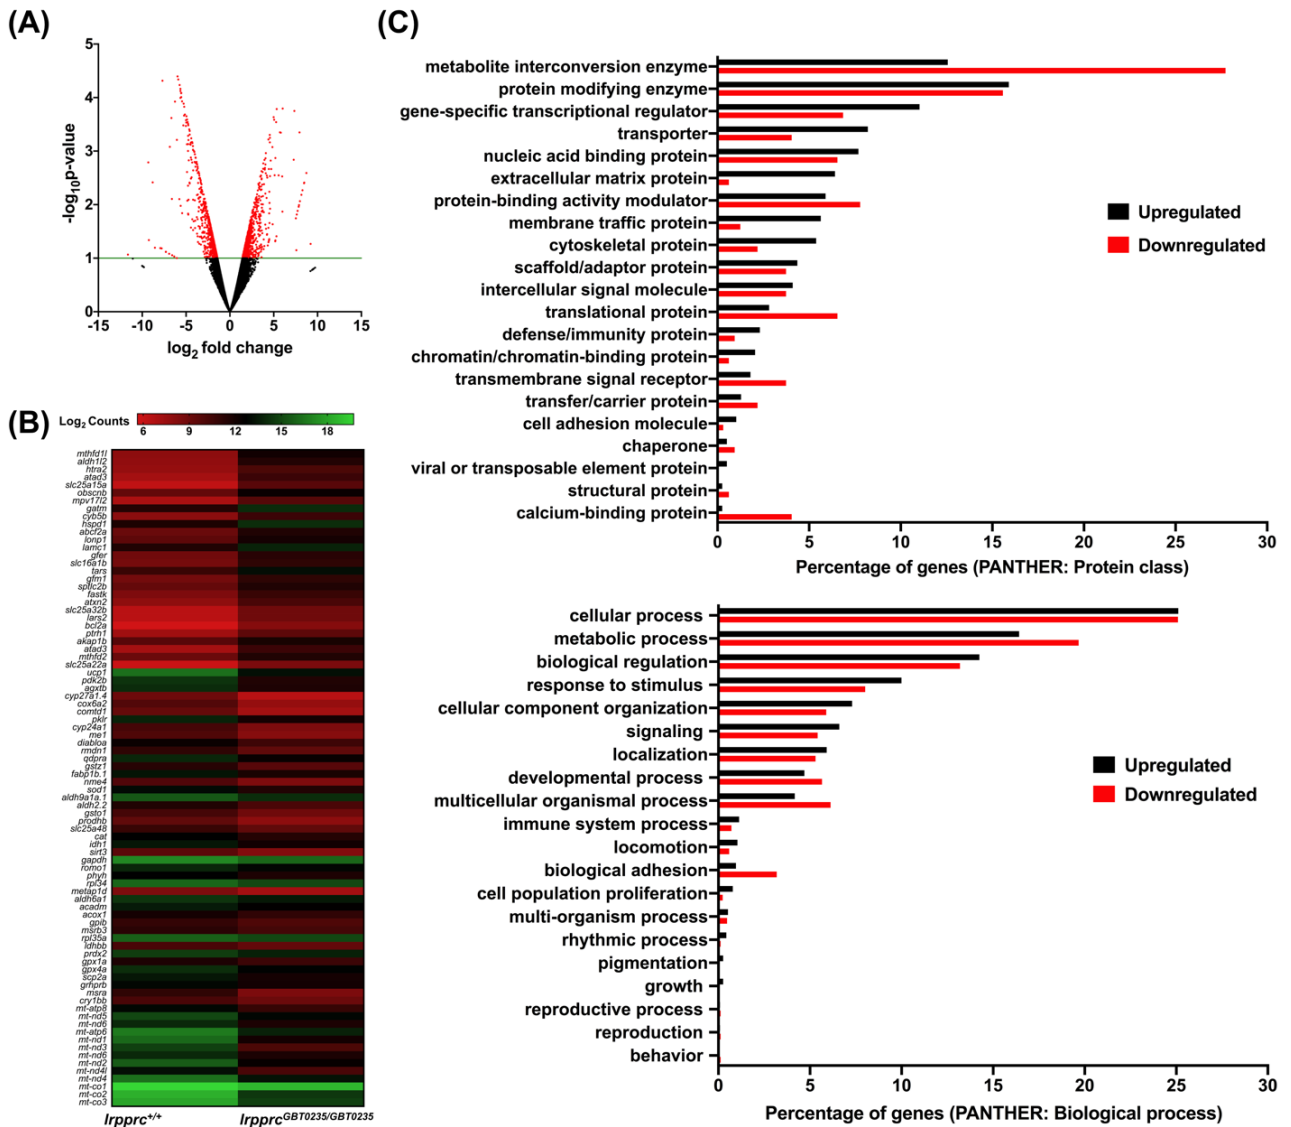

1072  
1073

1074 **Figure 6:**

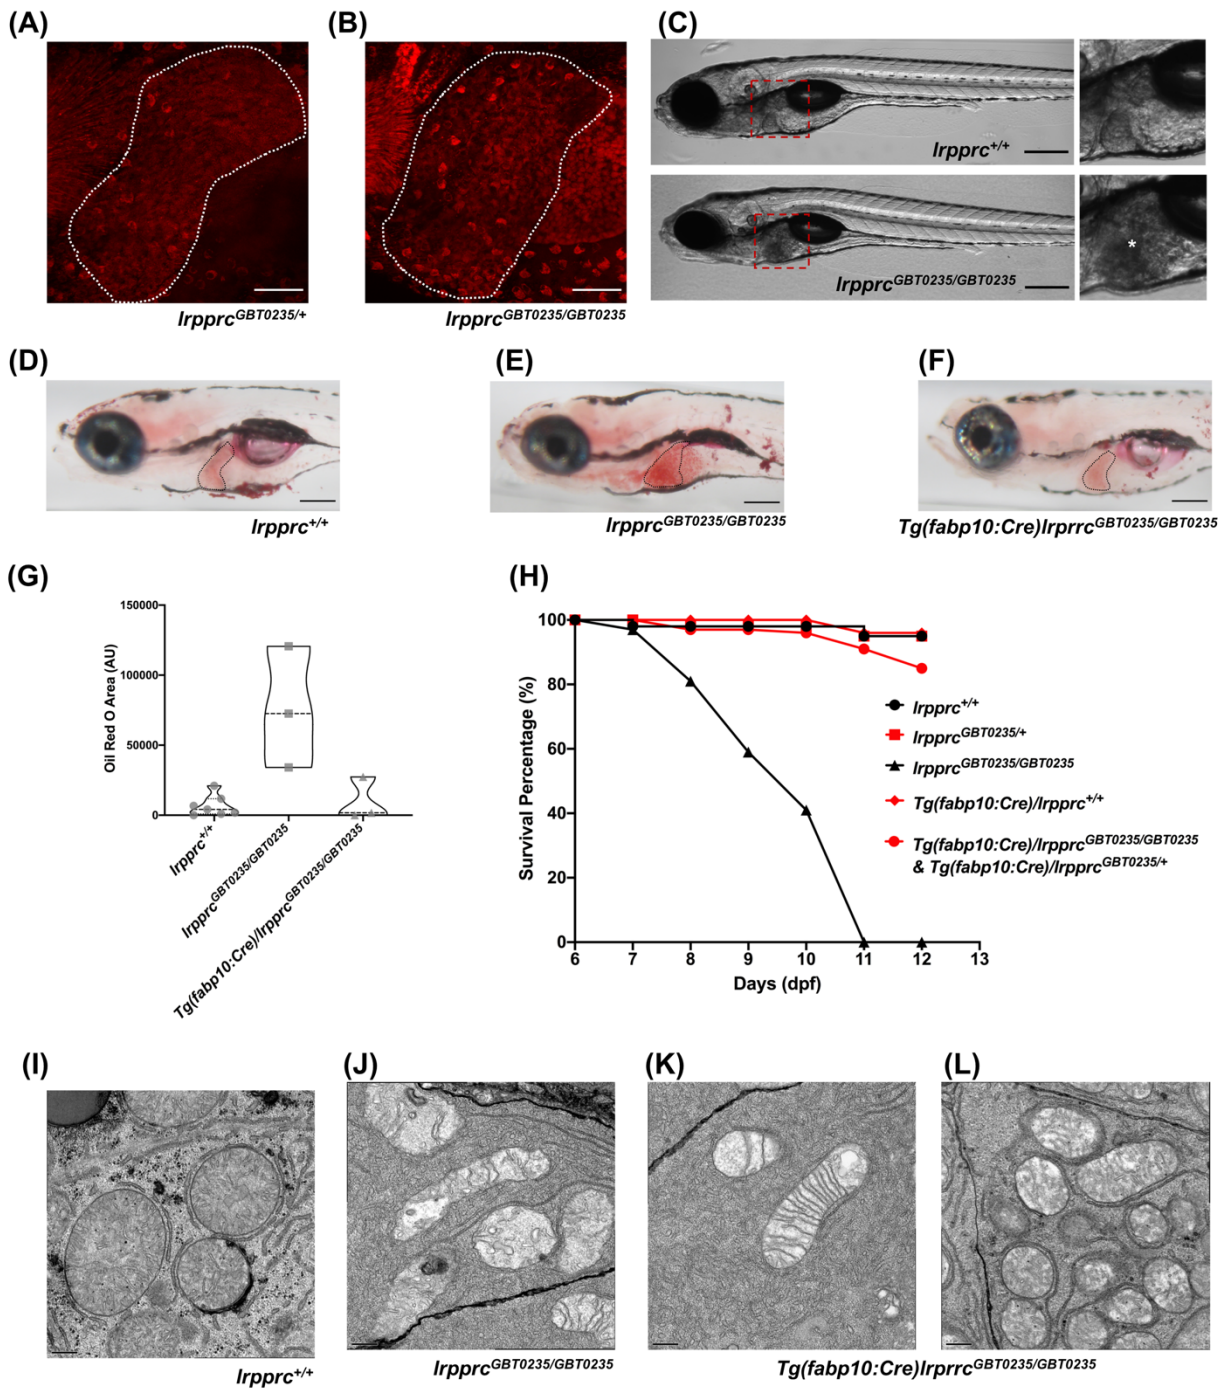

1075

1076 **Figure 7:**

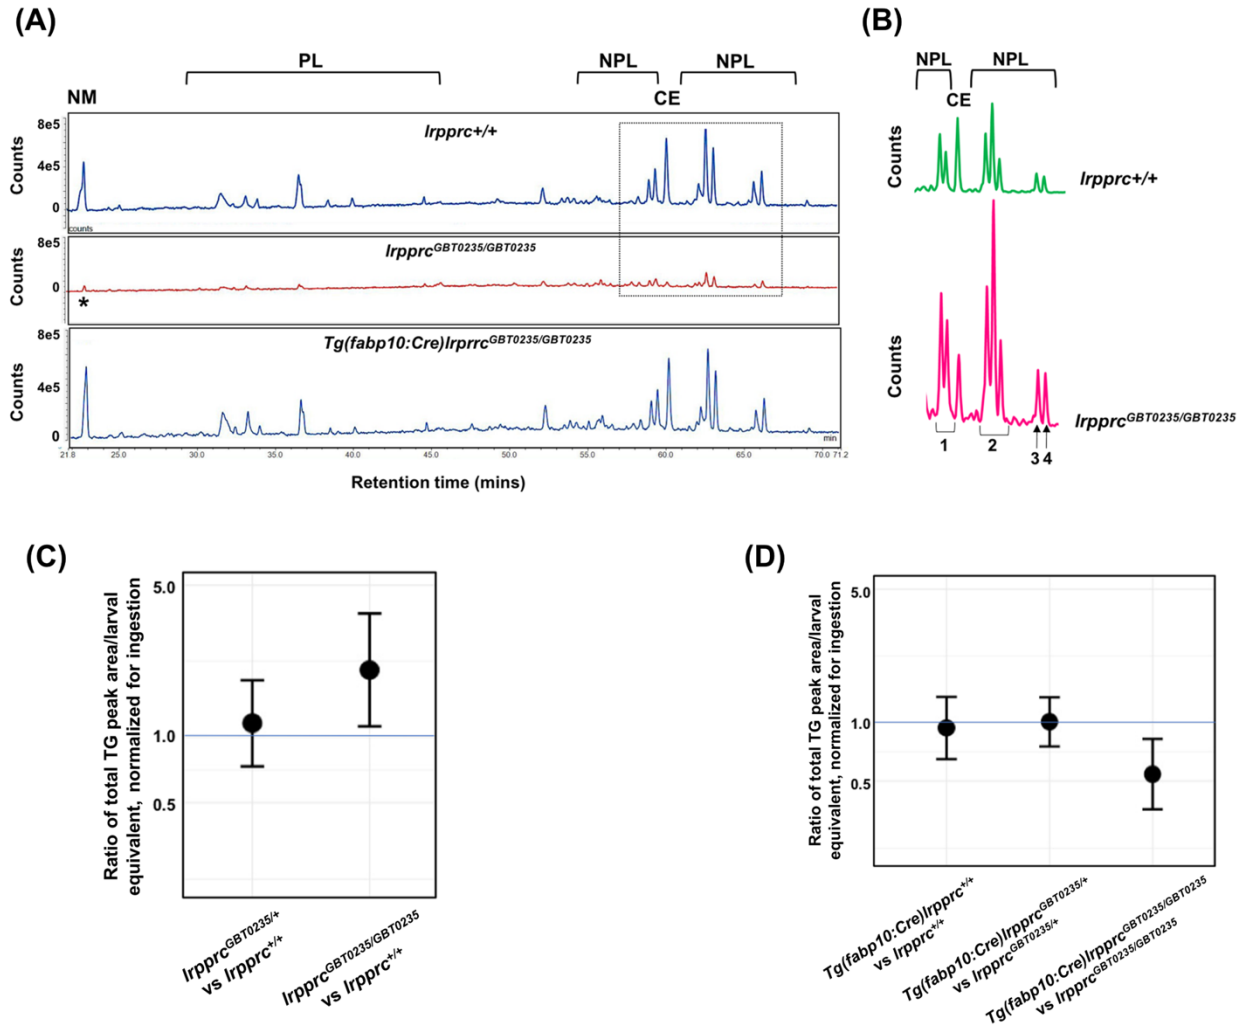

1077

## Supplementary Figures and Tables:

bioRxiv preprint doi: <https://doi.org/10.1101/2020.05.09.384681>; this version posted May 9, 2020. The copyright holder for this preprint (which was not certified by peer review) is the author/funder, who has granted bioRxiv a license to display the preprint in perpetuity. It is made available under a [CC-BY-NC-ND 4.0 International license](#).

### Supplementary Figures:

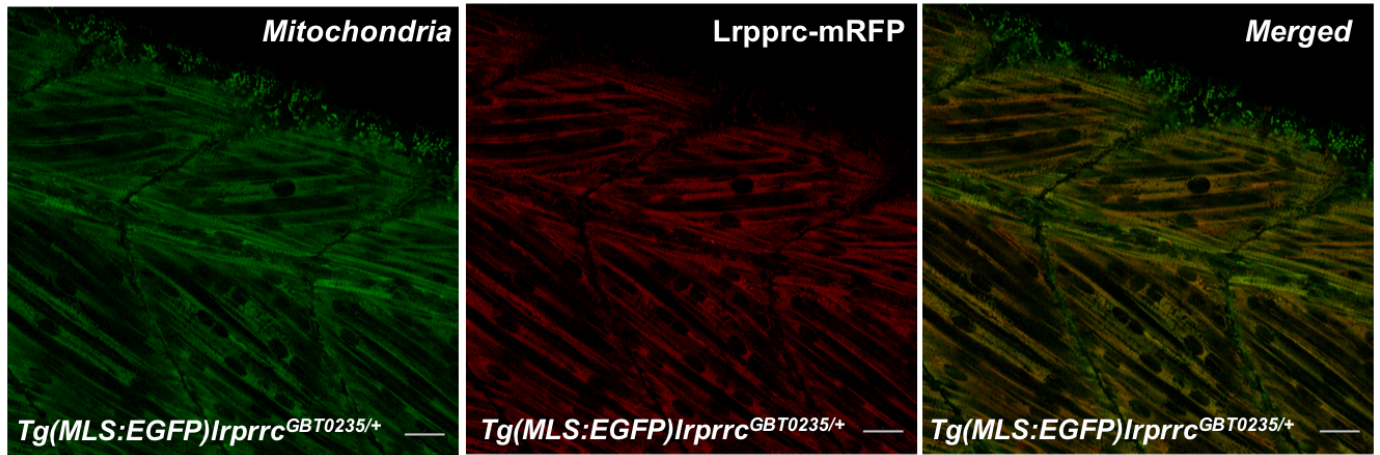

**Supplementary Figure 1: Lrprrc-mRFP localizes to the mitochondria in the zebrafish mutants.** 4 dpf *Tg(MLS:EGFP) lrprrc<sup>GBT0235/+</sup>* was used to observe the sub-cellular localization of the Lrprrc-mRFP protein in the myocytes from the skeletal muscle region (Scale bar: 20  $\mu$ m).

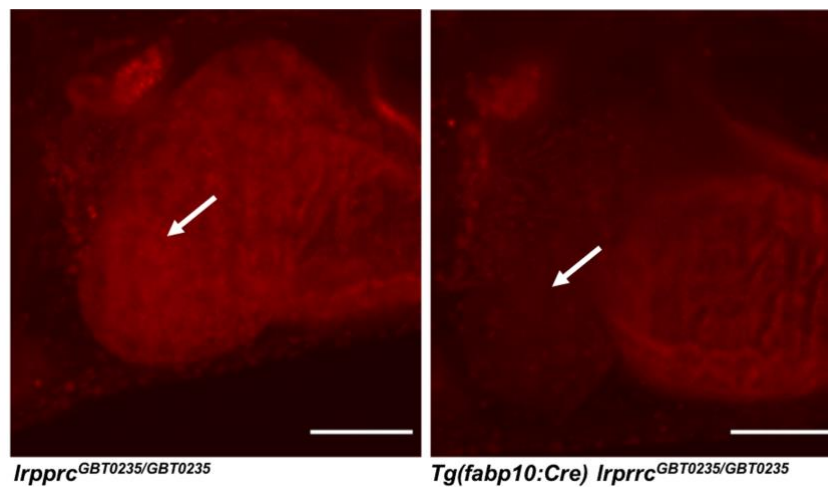

**Supplementary Figure 2: Irreversible liver-specific Cre recombinase mediated rescue.** *lrpprc*<sup>GBT0235/+</sup> adult zebrafish was crossed with *Tg(-2.8fabp10:Cre; -0.8cryaa:Venus)*<sup>S955</sup> to obtain double transgenic adult zebrafish expressing both the GBT cassette and the fabp10 driven Cre recombinase. The liver-specific Cre recombinase rescued the mRFP expression in the liver.

**Zebrafish MTS**

|                                                                                                                                                                                                                                                             |                  |                                                                     |                  |                  |                |
|-------------------------------------------------------------------------------------------------------------------------------------------------------------------------------------------------------------------------------------------------------------|------------------|---------------------------------------------------------------------|------------------|------------------|----------------|
| Human                                                                                                                                                                                                                                                       | 28               | PGG-----PGRLLHAASYLPAARAGPVAGGLLSPARLYAIAAKE-KDIQEES                |                  |                  |                |
| Zebrafish                                                                                                                                                                                                                                                   | 61               | SGAIGTLRVGVCGRQTVPGRLLNANSLFSYRPAALPCVS-----CRQYAVVPEQSGQVKDEA      |                  |                  |                |
| <b>HP1/ZP1</b>                                                                                                                                                                                                                                              |                  |                                                                     |                  |                  |                |
| Human                                                                                                                                                                                                                                                       | 73               | TFSSR-KISNQFDWALMRLDLSVRRTGRI PKKLLQKVFNDTCRSGGLGGSALLLLRSCG        |                  |                  |                |
| Zebrafish                                                                                                                                                                                                                                                   | 116              | SLAVRSKQAQQFDWALS KLDSSVRRTGRVTKTLLLHIFHDICRTGYPSGNQALLLLRSCG       |                  |                  |                |
| <table border="0" style="width: 100%;"> <tr> <td style="width: 50%; text-align: center;"><b>HP1/ZP1</b></td> <td style="width: 50%; text-align: center;"><b>HP2/ZP2</b></td> </tr> </table>                                                                 |                  |                                                                     | <b>HP1/ZP1</b>   | <b>HP2/ZP2</b>   |                |
| <b>HP1/ZP1</b>                                                                                                                                                                                                                                              | <b>HP2/ZP2</b>   |                                                                     |                  |                  |                |
| Human                                                                                                                                                                                                                                                       | 132              | SLLPEIKLEERTEFAHRIWDTLQKLGAVYDVSHYNALLKVYLQNEYKFSPTDFLAKMEEA        |                  |                  |                |
| Zebrafish                                                                                                                                                                                                                                                   | 176              | SLLPEVPLAERTELVKRIWDKLLELGVSYDVSHYNALLKTYLQNEFRFSPTDFLAKMEEA        |                  |                  |                |
| <table border="0" style="width: 100%;"> <tr> <td style="width: 33%; text-align: center;"><b>HP2/ZP2</b></td> <td style="width: 33%; text-align: center;"><b>HP3/ZP3</b></td> <td style="width: 33%; text-align: center;"><b>HP4/ZP4</b></td> </tr> </table> |                  |                                                                     | <b>HP2/ZP2</b>   | <b>HP3/ZP3</b>   | <b>HP4/ZP4</b> |
| <b>HP2/ZP2</b>                                                                                                                                                                                                                                              | <b>HP3/ZP3</b>   | <b>HP4/ZP4</b>                                                      |                  |                  |                |
| Human                                                                                                                                                                                                                                                       | 192              | NIQENRVTYQRLIASYCNVGDIEGASKILGFMKTKDLPVTEAVFSALVTGHRAGDMENA         |                  |                  |                |
| Zebrafish                                                                                                                                                                                                                                                   | 236              | NVQENRVTYQRLIAAYCEEENIEGASAILGFMKNKDLPI TEAVFNSLVVGHARAGDITSS       |                  |                  |                |
| <table border="0" style="width: 100%;"> <tr> <td style="width: 33%; text-align: center;"><b>HP4/ZP4</b></td> <td style="width: 33%; text-align: center;"><b>HP5/ZP5</b></td> <td style="width: 33%; text-align: center;"><b>HP6/ZP6</b></td> </tr> </table> |                  |                                                                     | <b>HP4/ZP4</b>   | <b>HP5/ZP5</b>   | <b>HP6/ZP6</b> |
| <b>HP4/ZP4</b>                                                                                                                                                                                                                                              | <b>HP5/ZP5</b>   | <b>HP6/ZP6</b>                                                      |                  |                  |                |
| Human                                                                                                                                                                                                                                                       | 252              | ENILTVMRDAGIEPSPDPTYLALLNAYA EKGDIDHVKQTL EKVEKSELHIMDRDLLQIIFS     |                  |                  |                |
| Zebrafish                                                                                                                                                                                                                                                   | 296              | EGILSVMKSAGIEPSPDPTYLSLLNMYAEKGDIDKIKQTL DVVENADFFLIMDRDLMQLVSS     |                  |                  |                |
| <b>HP6/ZP6</b>                                                                                                                                                                                                                                              |                  |                                                                     |                  |                  |                |
| Human                                                                                                                                                                                                                                                       | 312              | FSKAGYPQYVSEILEKVT CERRYIPDAMNLI LLLVTEKLEDVALQILLACP--V--SKED      |                  |                  |                |
| Zebrafish                                                                                                                                                                                                                                                   | 356              | LARTGHEQHVP EIVSRMRHERGYV PDAINLCLNLITHGHEKTA FSVLKS LSLTGMLDHTHTGD |                  |                  |                |
| <b>HP7/ZP7</b>                                                                                                                                                                                                                                              |                  |                                                                     |                  |                  |                |
| Human                                                                                                                                                                                                                                                       | 368              | GPSVFGSFFLQHCVTMNTPV EKLTDYCKKLKEVQMH SFPLQFTLHCALLANKTDLAKALM      |                  |                  |                |
| Zebrafish                                                                                                                                                                                                                                                   | 416              | TP-DFGNFFLRHCVNMDKSAEDIVG FCKDLKDLGLHSTPLOFTLOCALEGKKTSLSIGLM       |                  |                  |                |
| <table border="0" style="width: 100%;"> <tr> <td style="width: 50%; text-align: center;"><b>HP7/ZP7</b></td> <td style="width: 50%; text-align: center;"><b>HP8/ZP8</b></td> </tr> </table>                                                                 |                  |                                                                     | <b>HP7/ZP7</b>   | <b>HP8/ZP8</b>   |                |
| <b>HP7/ZP7</b>                                                                                                                                                                                                                                              | <b>HP8/ZP8</b>   |                                                                     |                  |                  |                |
| Human                                                                                                                                                                                                                                                       | 428              | KAVKEEGFPPIRPHYFWPLLVGRRKEKNVQGIIEILKGMQELGVHPDQETTYTDYVIPCFDS      |                  |                  |                |
| Zebrafish                                                                                                                                                                                                                                                   | 475              | KRMKAESLPIKPHYFLPLFAHHHKDKNIPAIIEVLRGMQEMSVPD VDAFVSFYILPSFPS       |                  |                  |                |
| Human                                                                                                                                                                                                                                                       | 488              | VNSARAILQENGLSDSDMFSQAGLRSEAANGNLD FVLSFLKSN TLP-ISLQ SIRSSLLL      |                  |                  |                |
| Zebrafish                                                                                                                                                                                                                                                   | 535              | LDNAKASLKEAGVDVNTDGLIVAE LRVQAYS GNLA KLLSLMSSPALPTIDLSVFRAGLIA     |                  |                  |                |
| Human                                                                                                                                                                                                                                                       | 547              | GFRRSMNINLWSEITELLYK DGRY CQEP RGPTEAVGYFLYNLIDSMS DSEVQAKEEHLRQ    |                  |                  |                |
| Zebrafish                                                                                                                                                                                                                                                   | 595              | GFKRFRQNVENMAKITELLYK DARFAADGH DASENVGYFLYNLIDSMS ETELQSNEEKIRE    |                  |                  |                |
| Human                                                                                                                                                                                                                                                       | 607              | YFHQLEKMNVKIPENIYRGIRN LLESYHVPELIKDAHL LIVESKNLDFQKTVQLTSSE---     |                  |                  |                |
| Zebrafish                                                                                                                                                                                                                                                   | 655              | YFGLLKS MNINISVNI FRGIRN ILESHHVPELVKEAL TLVD-KTDDMTEVMMFRSSEGRI    |                  |                  |                |
| <table border="0" style="width: 100%;"> <tr> <td style="width: 50%; text-align: center;"><b>HP9/ZP9</b></td> <td style="width: 50%; text-align: center;"><b>HP10/ZP10</b></td> </tr> </table>                                                               |                  |                                                                     | <b>HP9/ZP9</b>   | <b>HP10/ZP10</b> |                |
| <b>HP9/ZP9</b>                                                                                                                                                                                                                                              | <b>HP10/ZP10</b> |                                                                     |                  |                  |                |
| Human                                                                                                                                                                                                                                                       | 664              | --LESTLET LKAENQPI RDVLKQLILVLCSEENMQALEL KAKYESDMVTGGYAALINLC      |                  |                  |                |
| Zebrafish                                                                                                                                                                                                                                                   | 714              | SALVKTLAEQKAE GKP AHLT LKKLINVLSIEEKLEQALDLKSKYE DDMTPAAYATLINLC    |                  |                  |                |
| <table border="0" style="width: 100%;"> <tr> <td style="width: 50%; text-align: center;"><b>HP10/ZP10</b></td> <td style="width: 50%; text-align: center;"><b>HP11/ZP11</b></td> </tr> </table>                                                             |                  |                                                                     | <b>HP10/ZP10</b> | <b>HP11/ZP11</b> |                |
| <b>HP10/ZP10</b>                                                                                                                                                                                                                                            | <b>HP11/ZP11</b> |                                                                     |                  |                  |                |
| Human                                                                                                                                                                                                                                                       | 722              | CRHDKVEDALNLKEEFDRLDSSAVLITGKYVGLVRVLA KHGKLDQAINILKEMKEKDVLI       |                  |                  |                |
| Zebrafish                                                                                                                                                                                                                                                   | 774              | CRHDNAEEALKLKIEMARKDSEVALDAQKYIALVRVLSKHGKLEEALDILKEMKEKNIMI        |                  |                  |                |
| <table border="0" style="width: 100%;"> <tr> <td style="width: 50%; text-align: center;"><b>HP12/ZP12</b></td> <td style="width: 50%; text-align: center;"><b>HP13</b></td> </tr> </table>                                                                  |                  |                                                                     | <b>HP12/ZP12</b> | <b>HP13</b>      |                |
| <b>HP12/ZP12</b>                                                                                                                                                                                                                                            | <b>HP13</b>      |                                                                     |                  |                  |                |
| Human                                                                                                                                                                                                                                                       | 782              | KDTFALSFFHMLNGAALRGEIETVKQLHEAIVTLGLAEPSTNISFPLVTVHLEKGD LSTA       |                  |                  |                |
| Zebrafish                                                                                                                                                                                                                                                   | 834              | RDNLIIGFLTFTMNSIAMKGDADAIRRLQETIFTLGLAKP SNGLCSPLVTCYLES GDHAGA     |                  |                  |                |
| <b>HP13</b>                                                                                                                                                                                                                                                 |                  |                                                                     |                  |                  |                |
| Human                                                                                                                                                                                                                                                       | 842              | LEVAIDCYEKYKVLPR IHDVLC KLVEKGETDLIQKAMDFVSQE QGEMVMLYDLFFAFLQT     |                  |                  |                |
| Zebrafish                                                                                                                                                                                                                                                   | 894              | FDAVMECHKQYNQLPKI HDLMCSLVEKGDALLLQKVM EFLT LERGEMMMLYDLFFAFLQT     |                  |                  |                |

continued

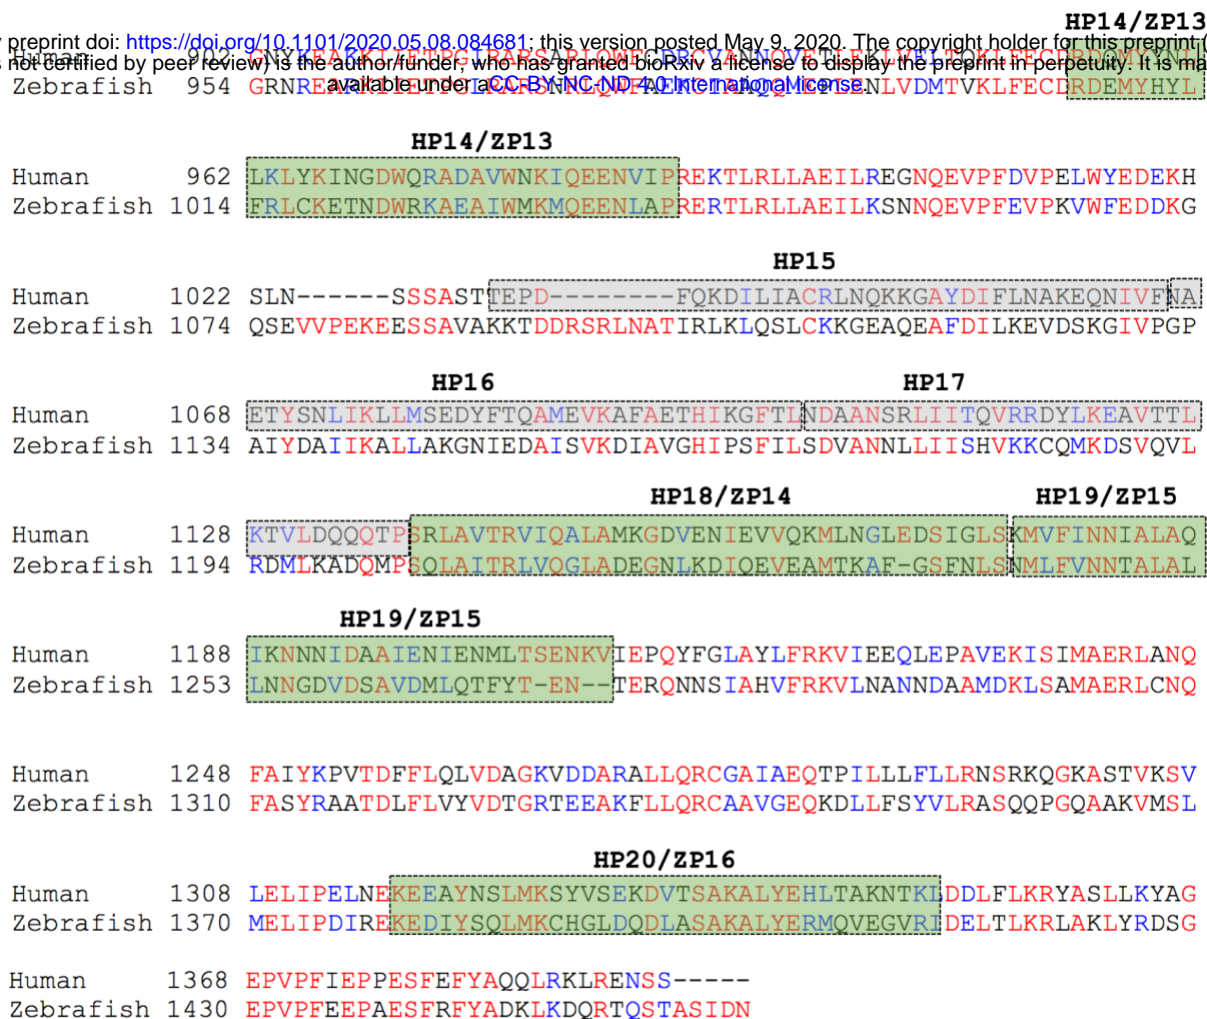

**PPR motifs amino acid homology**

40-60 %
  60-80 %
  80-90 %
  <40%

**Supplementary Figure 3: Amino acid alignment of LRRPRC human protein with zebrafish Lrrprc protein.** Multiple protein sequence alignment was performed by T-COFFEE multiple sequence alignment webserver. Zebrafish PPR domains were predicted by performing blastp using human PPR domains as the query. The colors of the boxes represent the percentage of homology between the two protein sequences. 16 zebrafish domains were predicted by the homology analysis. Predicted zebrafish mitochondrial targeting sequence is highlighted in blue box (1-77 amino acids). (HP(n): Human PPR domain; ZP(n): Zebrafish PPR domain)

## Supplementary Tables:

bioRxiv preprint doi: <https://doi.org/10.1101/2020.05.08.084681>; this version posted May 9, 2020. The copyright holder for this preprint (which was not certified by peer review) is the author/funder, who has granted bioRxiv a license to display the preprint in perpetuity. It is made available under a [CC-BY-NC-ND 4.0 International license](#).

**Supplementary Table 1:** List of oligonucleotides used in the study

| Gene Id             | Molecular assay | Forward primer (5'-3')        | Reverse primer (5'-3')       |
|---------------------|-----------------|-------------------------------|------------------------------|
| <i>lrpprc ex 22</i> | Genotyping      | GATGCTCAAAAGTACATCGCCTTGG     | -----                        |
| <i>GBT0235</i>      | Genotyping      | -----                         | GTCACAACAGCAACAGAGCTGAAC     |
| <i>mRFP</i>         | Genotyping      | -----                         | ACTCCTTGATGACGTCTCGGA        |
| <i>lrpprc</i>       | qPCR            | TGATAATGCTGAGGAAGCTCTCAAACCTG | CCTTCATCTCCTTCAGTATGTCTAACGC |
| <i>mt-nd1</i>       | qPCR            | CTGGCAGAAACAAACCGAGCACC       | GGTCCTGCTGCATACTCTACATTGAA   |
| <i>mt-nd4</i>       | qPCR            | ACATCAACTCGGAGCCTGTAAACC      | GTGTTGGGATAAGTGTAGCTTCG      |
| <i>mt-nd6</i>       | qPCR            | CTGTTATTCGAGCTGATGTAAGCGG     | CAGAAGCAATACCCAAGCACAAATC    |
| <i>mt-cyb</i>       | qPCR            | CCCTTACACGATTCTTCGCATTCC      | GGTTTCGTGGAGAAATAGCAAGTG     |
| <i>mt-co1</i>       | qPCR            | TGGTGCTTGAGCCGGAATAGTAGG      | CTCCTGGTTGGCTAAGTTCAGCTC     |
| <i>mt-atp6</i>      | qPCR            | CCCTTATCCTCGTTGCCATACTTCTAC   | GTTGGTTTGTGAATCGTCCAGTC      |
| <i>mt-atp8</i>      | qPCR            | ATGCCTCAGCTTAATCCAAAACCC      | GCATCAACTTGAGTTGGGTCATTAGG   |
| <i>rps6kb1</i>      | qPCR            | GAGCCGGCTGAGTCGGCTCC          | AGGCACTGCTGCAACTCTGGGA       |
| <i>nfe2l2a</i>      | qPCR            | AAATCTCTATGGCGCTCGGACACC      | TGGACTCCTTACACAGCCCGAAAGC    |
| <i>eef1a111</i>     | qPCR            | CCGTCTGCCAACTTCAGGATGTGT      | TTGAGGACACCAGTCTCCAACACGA    |



## Supplementary Table 2

### List of human Mitocarta orthologs for zebrafish genes observed to be significantly upregulated in *lrpprc* homozygous zebrafish mutants

| Zebrafish gene ID  | Zebrafish gene name    | Zebrafish gene description                                                                                                | log(base 2) Fold change | p-value | Human orthologue | Human orthologue gene description                                |
|--------------------|------------------------|---------------------------------------------------------------------------------------------------------------------------|-------------------------|---------|------------------|------------------------------------------------------------------|
| ENSDARG00000042221 | <i>methfd11</i>        | methylenetetrahydrofolate_dehydrogenase_(NADP+_dependent)_1-like_[Source:ZFIN;Acc:ZDB-GENE-041001-133]                    | 3.54                    | 0.0029  | <i>MTHFD1L</i>   | methylenetetrahydrofolate_dehydrogenase_(NADP+_dependent)_1_like |
| ENSDARG00000092625 | <i>si:dkey-10b15.8</i> | si:dkey-10b15.8_[Source:ZFIN;Acc:ZDB-GENE-141212-238]                                                                     | 8.47                    | 0.0040  | <i>HTRA2</i>     | HtrA_serine_peptidase_2                                          |
| ENSDARG00000070230 | <i>aldh112</i>         | aldehyde_dehydrogenase_1_family,_member_L2_[Source:ZFIN;Acc:ZDB-GENE-100426-6]                                            | 3.10                    | 0.0064  | <i>ALDH1L2</i>   | aldehyde_dehydrogenase_1_family_member_L2                        |
| ENSDARG00000086848 | <i>atad3</i>           | ATPase_family,_AAA_domain_containing_3_[Source:ZFIN;Acc:ZDB-GENE-040426-1826]                                             | 2.91                    | 0.0101  | <i>ATAD3B</i>    | ATPase_family_AAA_domain_containing_3B                           |
| ENSDARG00000063539 | <i>slc25a15a</i>       | solute_carrier_family_25_(mitochondrial_carrier;_ornithine_transporter)_member_15a_[Source:ZFIN;Acc:ZDB-GENE-070112-1072] | 2.86                    | 0.0142  | <i>SLC25A15</i>  | solute_carrier_family_25_member_15                               |
| ENSDARG00000022101 | <i>obscnb</i>          | obscurin,_cytoskeletal_calmodulin_and_titin-interacting_RhoGEF_b_[Source:ZFIN;Acc:ZDB-GENE-070119-5]                      | 2.40                    | 0.0190  | <i>OBSCN</i>     | obscurin,_cytoskeletal_calmodulin_and_titin-interacting_RhoGEF   |
| ENSDARG00000056367 | <i>mpv17l2</i>         | MPV17_mitochondrial_membrane_protein-like_2_[Source:ZFIN;Acc:ZDB-GENE-040718-306]                                         | 2.30                    | 0.0322  | <i>MPV17L2</i>   | MPV17_mitochondrial_inner_membrane_protein_like_2                |
| ENSDARG00000036239 | <i>gatm</i>            | glycine_amidinotransferase_(L-arginine:glycine_amidinotransferase)[Source:ZFIN;Acc:ZDB-GENE-021015-1]                     | 2.03                    | 0.0337  | <i>GATM</i>      | glycine_amidinotransferase                                       |

|                    |                 |                                                                                                                   |      |        |                |                                                       |
|--------------------|-----------------|-------------------------------------------------------------------------------------------------------------------|------|--------|----------------|-------------------------------------------------------|
| ENSDARG00000099774 | <i>cyb5b</i>    | cytochrome_b5_type_B_[Source:ZFIN;Acc:ZDB-GENE-040426-2614]                                                       | 2.05 | 0.0403 | <i>CYB5B</i>   | cytochrome_b5_type_B                                  |
| ENSDARG00000056160 | <i>hspd1</i>    | heat_shock_60_protein_1_[Source:ZFIN;Acc:ZDB-GENE-021206-1]                                                       | 1.79 | 0.0521 | <i>HSPD1</i>   | heat_shock_protein_family_D_(Hsp60)_member_1          |
| ENSDARG00000038785 | <i>abcf2a</i>   | ATP-binding_cassette,_sub-family_F_(GCN20),_member_2a_[Source:ZFIN;Acc:ZDB-GENE-030131-8714]                      | 1.83 | 0.0529 | <i>ABCF2</i>   | ATP_binding_cassette_subfamily_F_member_2             |
| ENSDARG00000102765 | <i>lonp1</i>    | lon_peptidase_1,_mitochondrial_[Source:ZFIN;Acc:ZDB-GENE-030131-4006]                                             | 1.82 | 0.0529 | <i>LONP1</i>   | lon_peptidase_1,_mitochondrial                        |
| ENSDARG00000036279 | <i>lamc1</i>    | laminin,_gamma_1_[Source:ZFIN;Acc:ZDB-GENE-021226-3]                                                              | 1.59 | 0.0752 | <i>LAMC1</i>   | laminin_subunit_gamma_1                               |
| ENSDARG00000070061 | <i>gfer</i>     | growth_factor,_augmenter_of_liver_regeneration_(ERV1_homolog,_S._cerevisiae)[Source:ZFIN;Acc:ZDB-GENE-060810-186] | 1.83 | 0.0547 | <i>GFER</i>    | growth_factor,_augmenter_of_liver_regeneration        |
| ENSDARG00000068572 | <i>slc16a1b</i> | solute_carrier_family_16_(monocarboxylate_transporter),_member_1b_[Source:ZFIN;Acc:ZDB-GENE-030515-5]             | 1.77 | 0.0612 | <i>SLC16A1</i> | solute_carrier_family_16_member_1                     |
| ENSDARG00000013250 | <i>tars</i>     | threonyl-tRNA_synthetase_[Source:ZFIN;Acc:ZDB-GENE-041010-218]                                                    | 1.67 | 0.0661 | <i>TARS1</i>   | threonyl-tRNA_synthetase                              |
| ENSDARG00000063624 | <i>gfm1</i>     | G_elongation_factor,_mitochondrial_1_[Source:ZFIN;Acc:ZDB-GENE-061013-79]                                         | 1.70 | 0.0692 | <i>GFMI</i>    | G_elongation_factor_mitochondrial_1                   |
| ENSDARG00000074287 | <i>sptlc2b</i>  | serine_palmitoyltransferase,_long_chain_base_subunit_2b_[Source:ZFIN;Acc:ZDB-GENE-080305-8]                       | 1.68 | 0.0693 | <i>SPTLC2</i>  | serine_palmitoyltransferase_long_chain_base_subunit_2 |
| ENSDARG00000062430 | <i>gpd2</i>     | glycerol-3-phosphate_dehydrogenase_2_(mitochondrial)[Source:ZFIN;Acc:ZDB-GENE-030131-4869]                        | 1.74 | 0.0709 | <i>GPD2</i>    | glycerol-3-phosphate_dehydrogenase_2                  |

|                    |                          |                                                                                                          |      |        |                       |                                                                                                      |
|--------------------|--------------------------|----------------------------------------------------------------------------------------------------------|------|--------|-----------------------|------------------------------------------------------------------------------------------------------|
| ENSDARG00000097890 | <i>si:ch1073-100f3.2</i> | si:ch1073-100f3.2_[Source:ZFIN;Acc:ZDB-GENE-131127-11]                                                   | 2.91 | 0.0712 | <i>SLC25A10</i>       | solute_carrier_family_25_member_10                                                                   |
| ENSDARG00000077075 | <i>fastk</i>             | Fas-activated_serine/threonine_kinase_[Source:ZFIN;Acc:ZDB-GENE-070912-680]                              | 1.70 | 0.0714 | <i>FASTK</i>          | Fas_activated_serine/threonine_kinase                                                                |
| ENSDARG00000052897 | <i>atxn2</i>             | ataxin_2_[Source:ZFIN;Acc:ZDB-GENE-060526-217]                                                           | 1.73 | 0.0733 | <i>ATXN2</i>          | ataxin_2                                                                                             |
| ENSDARG00000026835 | <i>slc25a32b</i>         | solute_carrier_family_25_(mitochondrial_folate_carrier),_member_32b_[Source:ZFIN;Acc:ZDB-GENE-050306-39] | 1.89 | 0.0773 | <i>SLC25A32</i>       | solute_carrier_family_25_member_32                                                                   |
| ENSDARG00000075337 | <i>lars2</i>             | leucyl-tRNA_synthetase_2,_mitochondrial_[Source:ZFIN;Acc:ZDB-GENE-070928-3]                              | 1.84 | 0.0826 | <i>LARS2</i>          | leucyl-tRNA_synthetase_2,_mitochondrial                                                              |
| ENSDARG00000094704 | <i>bcl2a</i>             | B-cell_CLL/lymphoma_2a_[Source:ZFIN;Acc:ZDB-GENE-051012-1]                                               | 1.96 | 0.0930 | <i>BCL2</i>           | BCL2_apoptosis_regulator                                                                             |
| ENSDARG00000098206 | <i>ptrh1</i>             | peptidyl-tRNA_hydrolase_1_homolog_[Source:ZFIN;Acc:ZDB-GENE-050306-33]                                   | 1.67 | 0.0932 | <i>PTRH1</i>          | peptidyl-tRNA_hydrolase_1_homolog                                                                    |
| ENSDARG00000006062 | <i>akap1b</i>            | A_kinase_(PRKA)_anchor_protein_1b_[Source:ZFIN;Acc:ZDB-GENE-030131-6844]                                 | 1.49 | 0.0942 | <i>AKAP1</i>          | A-kinase_anchoring_protein_1                                                                         |
| ENSDARG00000098646 | <i>methfd2</i>           | +_dependent)_2,_methenyltetrahydrofolate_cyclohydrolase_[Source:ZFIN;Acc:ZDB-GENE-040704-20]             | 1.87 | 0.0499 | <i>MTHFD2</i>         | methylenetetrahydrofolate_dehydrogenase_(NADP+ dependent)_2,_methenyltetrahydrofolate_cyclohydrolase |
| ENSDARG00000086848 | <i>atad3</i>             | ATPase_family,_AAA_domain_containing_3_[Source:ZFIN;Acc:ZDB-GENE-040426-1826]                            | 2.91 | 0.0101 | <i>ATAD3B; ATAD3A</i> | ATPase_family_AAA_domain_containing_3B                                                               |
| ENSDARG00000020718 | <i>slc25a22a</i>         | solute_carrier_family_25_member_22_[Source:HGNC_Symbol;Acc:HGNC:19954]                                   | 2.04 | 0.0723 | <i>SLC25A22</i>       | solute_carrier_family_25_member_22                                                                   |

### Supplementary Table 3

**List of human Mitocarta orthologs for zebrafish genes observed to be significantly downregulated in *lrpprc* homozygous zebrafish mutants**

| Zebrafish gene ID  | Zebrafish gene name | Zebrafish gene description                                                                        | log(base 2) Fold change | p-value | Human orthologue | Human orthologue gene description                       |
|--------------------|---------------------|---------------------------------------------------------------------------------------------------|-------------------------|---------|------------------|---------------------------------------------------------|
| ENSDARG00000023151 | <i>ucp1</i>         | uncoupling_protein_1_[Source:ZFIN;Acc:ZDB-GENE-010503-1]                                          | -3.75                   | 0.0017  | <i>UCP1</i>      | uncoupling protein 1                                    |
| ENSDARG00000059054 | <i>pdk2b</i>        | pyruvate_dehydrogenase_kinase_isozyme_2b_[Source:ZFIN;Acc:ZDB-GENE-040426-939]                    | -3.35                   | 0.0035  | <i>PDK2</i>      | pyruvate dehydrogenase kinase 2                         |
| ENSDARG00000052099 | <i>agxta</i>        | alanine-glyoxylate_aminotransferase_a_[Source:ZFIN;Acc:ZDB-GENE-040718-16]                        | -3.33                   | 0.0038  | <i>AGXT</i>      | alanine-glyoxylate_and_serine-pyruvate aminotransferase |
| ENSDARG00000055159 | <i>cyp27a1.4</i>    | cytochrome_P450_family_27_subfamily_A_polypeptide_1_gene_4_[Source:ZFIN;Acc:ZDB-GENE-030131-1060] | -3.12                   | 0.0099  | <i>CYP27A1</i>   | cytochrome_P450_family_27_subfamily A member 1          |
| ENSDARG00000054588 | <i>cox6a2</i>       | cytochrome_c_oxidase_subunit_VIa_polypeptide_2_[Source:ZFIN;Acc:ZDB-GENE-040912-129]              | -2.87                   | 0.0111  | <i>COX6A1</i>    | cytochrome_c_oxidase_subunit_6A1                        |
| ENSDARG00000078918 | <i>comtd1</i>       | catechol-O-methyltransferase_domain_containing_1_[Source:ZFIN;Acc:ZDB-GENE-030131-1072]           | -2.72                   | 0.0164  | <i>COMTD1</i>    | catechol-O-methyltransferase_domain_containing 1        |
| ENSDARG00000042010 | <i>pklr</i>         | pyruvate_kinase_liver_and_RBC_[Source:ZFIN;Acc:ZDB-GENE-010907-1]                                 | -2.44                   | 0.0167  | <i>PKLR</i>      | pyruvate kinase L/R]                                    |
| ENSDARG00000103277 | <i>cyp24a1</i>      | cytochrome_P450_family_24_subfamily_A_polypeptide_1_[Source:ZFIN;Acc:ZDB-GENE-060825-1]           | -2.44                   | 0.0204  | <i>CYP24A1</i>   | cytochrome_P450_family_24_subfamily A member 1          |

|                   |                   |                                                                                                         |       |        |                |                                           |
|-------------------|-------------------|---------------------------------------------------------------------------------------------------------|-------|--------|----------------|-------------------------------------------|
| ENSDARG0000053215 | <i>me1</i>        | malic_enzyme_1,_NADP(+)-dependent,_cytosolic_[Source:ZFIN;Acc:ZDB-GENE-061013-438]                      | -2.45 | 0.0212 | <i>ME1</i>     | malic enzyme 1                            |
| ENSDARG0000104172 | <i>diabloa</i>    | diablo,_IAP-binding_mitochondrial_protein_a_[Source:ZFIN;Acc:ZDB-GENE-040426-1303]                      | -2.30 | 0.0220 | <i>DIABLO</i>  | diablo_IAP-binding mitochondrial protein] |
| ENSDARG0000074507 | <i>rmdn1</i>      | regulator_of_microtubule_dynamics_1_[Source:ZFIN;Acc:ZDB-GENE-070928-17]                                | -2.29 | 0.0241 | <i>RMDN1</i>   | regulator_of_microtubule_dynamics 1       |
| ENSDARG0000040190 | <i>qdpra</i>      | quinoid_dihydropteridine_reductase_a_[Source:ZFIN;Acc:ZDB-GENE-070705-197]                              | -2.21 | 0.0247 | <i>QDPR</i>    | quinoid_dihydropteridine_reductase        |
| ENSDARG0000027984 | <i>gstz1</i>      | glutathione_S-transferase_zeta_1_[Source:ZFIN;Acc:ZDB-GENE-040718-184]                                  | -2.23 | 0.0258 | <i>GSTZ1</i>   | glutathione S-transferase zeta 1          |
| ENSDARG0000059227 | <i>fabp1b.1</i>   | fatty_acid_binding_protein_1b,_tandem_duplicate_1_[Source:ZFIN;Acc:ZDB-GENE-050522-96]                  | -2.16 | 0.0271 | <i>FABP1</i>   | fatty acid binding protein 1              |
| ENSDARG0000088390 | <i>nme4</i>       | NME/NM23_nucleoside_diphosphate_kinase_4_[Source:ZFIN;Acc:ZDB-GENE-040426-1043]                         | -2.21 | 0.0315 | <i>NME4</i>    | NME/NM23_nucleoside_diphosphate kinase 4  |
| ENSDARG0000043848 | <i>sod1</i>       | superoxide_dismutase_1,_soluble_[Source:ZFIN;Acc:ZDB-GENE-990415-258]                                   | -2.03 | 0.0341 | <i>SOD1</i>    | superoxide dismutase 1                    |
| ENSDARG0000069100 | <i>aldh9a1a.1</i> | aldehyde_dehydrogenase_9_family,_member_A1a,_tandem_duplicate_1_[Source:ZFIN;Acc:ZDB-GENE-030131-1257]  | -2.01 | 0.0346 | <i>ALDH9A1</i> | aldehyde_dehydrogenase_9_family_member A1 |
| ENSDARG0000028087 | <i>aldh2.2</i>    | aldehyde_dehydrogenase_2_family_(mitochondrial),_tandem_duplicate_2_[Source:ZFIN;Acc:ZDB-GENE-030326-5] | -2.01 | 0.0373 | <i>ALDH2</i>   | aldehyde_dehydrogenase_2_family_member    |
| ENSDARG0000022183 | <i>gstol</i>      | glutathione_S-transferase_omega_1_[Source:ZFIN;Acc:ZDB-GENE-040718-365]                                 | -2.02 | 0.0407 | <i>GSTO1</i>   | glutathione S-transferase omega 1         |

|                    |                 |                                                                                       |       |        |                 |                                                 |
|--------------------|-----------------|---------------------------------------------------------------------------------------|-------|--------|-----------------|-------------------------------------------------|
| ENSDARG00000086512 | <i>prodhb</i>   | proline_dehydrogenase_(oxidase)_1b_[Source:ZFIN;Acc:ZDB-GENE-101116-1]                | -2.10 | 0.0414 | <i>PRODH</i>    | proline dehydrogenase 1                         |
| ENSDARG00000021250 | <i>slc25a48</i> | solute_carrier_family_25_member_48_[Source:ZFIN;Acc:ZDB-GENE-040718-60]               | -1.97 | 0.0424 | <i>SLC25A48</i> | solute_carrier_family_25_member_48              |
| ENSDARG00000104702 | <i>cat</i>      | catalase_[Source:ZFIN;Acc:ZDB-GENE-000210-20]                                         | -1.90 | 0.0434 | <i>CAT</i>      | catalase]                                       |
| ENSDARG00000025375 | <i>idh1</i>     | isocitrate_dehydrogenase_1_(NADP+)_soluble_[Source:ZFIN;Acc:ZDB-GENE-031006-1]        | -1.89 | 0.0440 | <i>IDH1</i>     | isocitrate_dehydrogenase_(NADP(+)) 1, cytosolic |
| ENSDARG00000035819 | <i>sirt3</i>    | sirtuin_3_[Source:ZFIN;Acc:ZDB-GENE-070112-1762]                                      | -1.93 | 0.0533 | <i>SIRT3</i>    | sirtuin 3                                       |
| ENSDARG00000043457 | <i>gapdh</i>    | glyceraldehyde-3-phosphate_dehydrogenase_[Source:ZFIN;Acc:ZDB-GENE-030115-1]          | -1.70 | 0.0597 | <i>GAPDH</i>    | glyceraldehyde-3-phosphate dehydrogenase        |
| ENSDARG00000038076 | <i>romol</i>    | reactive_oxygen_species_modulator_1_[Source:ZFIN;Acc:ZDB-GENE-040426-1768]            | -1.66 | 0.0657 | <i>ROMO1</i>    | reactive_oxygen_species_modulator 1             |
| ENSDARG00000086740 | <i>phyh</i>     | phytanoyl-CoA_2-hydroxylase_[Source:ZFIN;Acc:ZDB-GENE-050417-361]                     | -1.62 | 0.0716 | <i>PHYH</i>     | phytanoyl-CoA 2-hydroxylase                     |
| ENSDARG00000029500 | <i>rpl34</i>    | ribosomal_protein_L34_[Source:ZFIN;Acc:ZDB-GENE-040426-1033]                          | -1.58 | 0.0747 | <i>RPL34</i>    | ribosomal protein L34                           |
| ENSDARG00000019715 | <i>metap1d</i>  | methionyl_aminopeptidase_type_1D_(mitochondrial)_[Source:ZFIN;Acc:ZDB-GENE-050522-71] | -1.84 | 0.0799 | <i>METAP1D</i>  | methionyl_aminopeptidase_type_1D, mitochondrial |
| ENSDARG00000053485 | <i>aldh6a1</i>  | aldehyde_dehydrogenase_6_family_member_A1_[Source:ZFIN;Acc:ZDB-GENE-030131-9192]      | -1.55 | 0.0803 | <i>ALDH6A1</i>  | aldehyde_dehydrogenase_6_family_member A1       |

|                   |               |                                                                                           |       |        |               |                                          |
|-------------------|---------------|-------------------------------------------------------------------------------------------|-------|--------|---------------|------------------------------------------|
| ENSDARG0000038900 | <i>acadm</i>  | acyl-CoA_dehydrogenase,_C-4_to_C-12_straight_chain_[Source:ZFIN;Acc:ZDB-GENE-040426-1945] | -1.54 | 0.0823 | <i>ACADM</i>  | acyl-CoA dehydrogenase medium chain      |
| ENSDARG0000014727 | <i>acox1</i>  | acyl-CoA_oxidase_1,_palmitoyl_[Source:ZFIN;Acc:ZDB-GENE-041010-219]                       | -1.51 | 0.0894 | <i>ACOX1</i>  | acyl-CoA oxidase 1                       |
| ENSDARG0000103826 | <i>gpib</i>   | glucose-6-phosphate_isomerase_b_[Source:ZFIN;Acc:ZDB-GENE-020513-3]                       | -1.53 | 0.0899 | <i>GPI</i>    | glucose-6-phosphate isomerase]           |
| ENSDARG0000045658 | <i>msrb3</i>  | methionine_sulfoxide_reductase_B3_[Source:ZFIN;Acc:ZDB-GENE-040625-74]                    | -1.48 | 0.0966 | <i>MSRB3</i>  | methionine sulfoxide reductase B3        |
| ENSDARG0000088030 | <i>rpl35a</i> | ribosomal_protein_L35a_[Source:ZFIN;Acc:ZDB-GENE-040718-190]                              | -1.44 | 0.0970 | <i>RPL35A</i> | ribosomal protein L35a[                  |
| ENSDARG0000071076 | <i>ldhbb</i>  | lactate_dehydrogenase_Bb_[Source:ZFIN;Acc:ZDB-GENE-040718-176]                            | -1.50 | 0.0997 | <i>LDHB</i>   | lactate dehydrogenase B                  |
| ENSDARG0000025350 | <i>prdx2</i>  | peroxiredoxin_2_[Source:ZFIN;Acc:ZDB-GENE-030326-2]                                       | -1.56 | 0.0783 | <i>PRDX1</i>  | peroxiredoxin 1                          |
| ENSDARG0000068478 | <i>gpx4a</i>  | glutathione_peroxidase_4a_[Source:ZFIN;Acc:ZDB-GENE-030410-2]                             | -2.02 | 0.0346 | <i>GPX4</i>   | glutathione peroxidase 4                 |
| ENSDARG0000018146 | <i>gpx1a</i>  | glutathione_peroxidase_1a_[Source:ZFIN;Acc:ZDB-GENE-030410-1]                             | -1.68 | 0.0668 | <i>GPX1</i>   | glutathione peroxidase 1                 |
| ENSDARG0000012194 | <i>scp2a</i>  | sterol_carrier_protein_2a_[Source:ZFIN;Acc:ZDB-GENE-040426-1846]                          | -2.07 | 0.0318 | <i>SCP2</i>   | sterol carrier protein 2                 |
| ENSDARG0000019986 | <i>grhprb</i> | glyoxylate_reductase/hydroxypyruvate_reductase_b_[Source:ZFIN;Acc:ZDB-GENE-040426-1847]   | -1.52 | 0.0854 | <i>GRHPR</i>  | glyoxylate and hydroxypyruvate reductase |

|                   |                |                                                                                      |       |        |                |                                                                            |
|-------------------|----------------|--------------------------------------------------------------------------------------|-------|--------|----------------|----------------------------------------------------------------------------|
| ENSDARG0000054588 | <i>cox6a2</i>  | cytochrome_c_oxidase_subunit_VIa_polypeptide_2_[Source:ZFIN;Acc:ZDB-GENE-040912-129] | -2.87 | 0.0111 | <i>COX6A2</i>  | cytochrome_c_oxidase_subunit_6A1_[Source:HGNC_Symbol;Acc:HGNC:2277]        |
| ENSDARG0000029587 | <i>msra</i>    | methionine_sulfoxide_reductase_A_[Source:ZFIN;Acc:ZDB-GENE-041014-344]               | -3.19 | 0.0054 | <i>MSRA</i>    | methionine sulfoxide reductase A                                           |
| ENSDARG0000069074 | <i>cry1ba</i>  | cryptochrome_circadian_clock_1ba_[Source:ZFIN;Acc:ZDB-GENE-010426-4]                 | -1.80 | 0.0506 | <i>CRY1</i>    | cryptochrome circadian regulator 3a                                        |
| ENSDARG0000091131 | <i>cry1bb</i>  | cryptochrome_circadian_clock_1bb_[Source:ZFIN;Acc:ZDB-GENE-010426-5]                 | -1.75 | 0.0650 | <i>CRY1</i>    | cryptochrome circadian regulator 3b                                        |
| ENSDARG0000063895 | <i>mt-nd1</i>  | NADH_dehydrogenase_1,_mitochondrial_[Source:ZFIN;Acc:ZDB-GENE-011205-7]              | -4.63 | 0.0004 | <i>MT-ND1</i>  | biquinone_oxidoreductase_core_subunit_1_[Source:HGNC_Symbol;Acc:HGNC:7455] |
| ENSDARG0000063899 | <i>mt-nd2</i>  | NADH_dehydrogenase_2,_mitochondrial_[Source:ZFIN;Acc:ZDB-GENE-011205-8]              | -3.91 | 0.0013 | <i>MT-ND2</i>  | biquinone_oxidoreductase_core_subunit_2_[Source:HGNC_Symbol;Acc:HGNC:7456] |
| ENSDARG0000063914 | <i>mt-nd3</i>  | NADH_dehydrogenase_3,_mitochondrial_[Source:ZFIN;Acc:ZDB-GENE-011205-9]              | -5.21 | 0.0001 | <i>MT-ND3</i>  | biquinone_oxidoreductase_core_subunit_3_[Source:HGNC_Symbol;Acc:HGNC:7458] |
| ENSDARG0000063917 | <i>mt-nd4</i>  | NADH_dehydrogenase_4,_mitochondrial_[Source:ZFIN;Acc:ZDB-GENE-011205-10]             | -3.68 | 0.0020 | <i>MT-ND4</i>  | biquinone_oxidoreductase_core_subunit_4_[Source:HGNC_Symbol;Acc:HGNC:7459] |
| ENSDARG0000063916 | <i>mt-nd4l</i> | NADH_dehydrogenase_4L,_mitochondrial_[Source:ZFIN;Acc:ZDB-GENE-011205-11]            | -3.58 | 0.0024 | <i>MT-ND4L</i> | NADH_dehydrogenase_4L,_mitochondrial                                       |
| ENSDARG0000063921 | <i>mt-nd5</i>  | NADH_dehydrogenase_5,_mitochondrial_[Source:ZFIN;Acc:ZDB-GENE-011205-12]             | -2.77 | 0.0093 | <i>MT-ND5</i>  | mitochondrially_encoded_NADH:ubiquinone_oxidoreductase_core_subunit_5      |
| ENSDARG0000063922 | <i>mt-nd6</i>  | NADH_dehydrogenase_6,_mitochondrial_[Source:ZFIN;Acc:ZDB-GENE-011205-13]             | -2.88 | 0.0078 | <i>MT-ND6</i>  | mitochondrially_encoded_NADH:ubiquinone_oxidoreductase_core_subunit_6      |



|                    |                |                                                                             |       |        |                |                                                         |
|--------------------|----------------|-----------------------------------------------------------------------------|-------|--------|----------------|---------------------------------------------------------|
| ENSDARG00000063924 | <i>mt-cyb</i>  | cytochrome_b_mitochondrial_[Source:ZFIN;Acc:ZDB-GENE-011205-17]             | -4.88 | 0.0003 | <i>MT-CYB</i>  | mitochondrially_encoded_cytochrome b                    |
| ENSDARG00000063905 | <i>mt-co1</i>  | cytochrome_c_oxidase_I_mitochondrial_[Source:ZFIN;Acc:ZDB-GENE-011205-14]   | -1.61 | 0.0710 | <i>MT-CO1</i>  | mitochondrially_encoded_cytochrome c oxidase I          |
| ENSDARG00000063908 | <i>mt-co2</i>  | cytochrome_c_oxidase_II_mitochondrial_[Source:ZFIN;Acc:ZDB-GENE-011205-15]  | -4.59 | 0.0004 | <i>MT-CO2</i>  | mitochondrially_encoded_cytochrome c oxidase II         |
| ENSDARG00000063912 | <i>mt-co3</i>  | cytochrome_c_oxidase_III_mitochondrial_[Source:ZFIN;Acc:ZDB-GENE-011205-16] | -3.91 | 0.0013 | <i>MT-CO3</i>  | mitochondrially_encoded_cytochrome c oxidase III        |
| ENSDARG00000063911 | <i>mt-atp6</i> | ATP_synthase_6_mitochondrial_[Source:ZFIN;Acc:ZDB-GENE-011205-18]           | -3.51 | 0.0026 | <i>MT-ATP6</i> | mitochondrially_encoded_ATP_synthase membrane subunit 6 |
| ENSDARG00000063910 | <i>mt-atp8</i> | ATP_synthase_8_mitochondrial_[Source:ZFIN;Acc:ZDB-GENE-011205-19]           | -2.69 | 0.0109 | <i>MT-ATP8</i> | ATP synthase 8, mitochondrial                           |
